# Supplementary material for: Hydrolysis mechanisms of BNPP mediated by facial copper(ii) complexes bearing single alkyl guanidine pendants: cooperation between the metal centers and the guanidine pendants
Source: Royal Society of Chemistry journal article supplement (doi:10.1039/c5dt03949e), 2015-12-09
Supplement: c5dt03949e1.pdf [file c5dt03949e1.pdf]

## *Supplementary Material*

### **Mechanistic Investigation of the Hydrolysis of DNA Dinucleotide Analogues Mediated by Mononuclear/Dinuclear Facial Copper(II) Complexes Bearing Single Guanidine Pendant: Cooperation Between the Metal Centers and the Guanidine Pendant**

*Xuepeng Zhang<sup>[a]</sup>, Xueping Liu<sup>[a]</sup>, David Lee Phillips<sup>[b]</sup> and Cunyuan Zhao\*<sup>[a]</sup>*

[a] MOE Key Laboratory of Bioinorganic and Synthetic Chemistry, School of Chemistry and Chemical Engineering, Sun Yat-Sen University, Guangzhou 510275, P. R. China.

[b] Department of Chemistry, The University of Hong Kong, Pokfulam Road, Hong Kong, P. R. China.

**Cartesian coordinates of optimized structures.**

**[Cu<sub>2</sub>(L<sup>1</sup>)<sub>2</sub>(μ-OH)]<sup>3+</sup> Triplet  
E : -1840.34083519 a.u.**

|    |          |          |          |
|----|----------|----------|----------|
| Cu | 0.       | 2.02911  | 0.19598  |
| O  | 0.       | 0.       | 0.74764  |
| H  | 0.       | 0.       | 1.7181   |
| N  | 0.40997  | 3.96325  | -0.54827 |
| N  | 1.57195  | 2.51929  | 1.54211  |
| N  | -1.17804 | 3.27121  | 1.7509   |
| N  | -1.00362 | 1.87393  | -1.57587 |
| N  | -2.85069 | 1.29191  | -2.92154 |
| N  | -2.42544 | 0.12916  | -0.96518 |
| C  | 1.67627  | 4.49238  | 0.04962  |
| H  | 1.42185  | 5.26285  | 0.7793   |
| H  | 2.28289  | 4.98549  | -0.71817 |
| C  | 2.47749  | 3.36907  | 0.70843  |
| H  | 2.91659  | 2.71731  | -0.05399 |
| H  | 3.29806  | 3.78861  | 1.30426  |
| C  | 1.08414  | 3.18446  | 2.79617  |
| H  | 1.34615  | 4.24344  | 2.74669  |
| H  | 1.61578  | 2.78284  | 3.66476  |
| C  | -0.42788 | 3.01843  | 3.00278  |
| H  | -0.65732 | 1.9923   | 3.31409  |
| H  | -0.7396  | 3.67932  | 3.82356  |
| C  | -1.15437 | 4.68765  | 1.28768  |
| H  | -0.45926 | 5.25988  | 1.90759  |
| H  | -2.13265 | 5.15988  | 1.42559  |
| C  | -0.78021 | 4.79305  | -0.1996  |
| H  | -1.61825 | 4.43823  | -0.80076 |
| H  | -0.60033 | 5.8432   | -0.46815 |
| C  | 0.55245  | 3.71624  | -2.01165 |
| H  | 1.48129  | 3.15414  | -2.14917 |
| H  | 0.65033  | 4.66535  | -2.55559 |
| C  | -0.62913 | 2.9092   | -2.55066 |
| H  | -1.4742  | 3.58403  | -2.74778 |
| H  | -0.33676 | 2.46938  | -3.51405 |
| C  | -2.06775 | 1.14289  | -1.82906 |
| H  | 2.08237  | 1.67698  | 1.80198  |
| H  | -2.14433 | 2.98527  | 1.89372  |
| H  | -3.42082 | 0.008    | -0.81077 |
| H  | -3.57761 | 0.62336  | -3.14067 |
| H  | -2.69314 | 2.01844  | -3.60434 |
| H  | -1.84571 | 0.08864  | -0.12837 |
| Cu | 0.       | -2.02911 | 0.19598  |
| N  | -0.40997 | -3.96325 | -0.54827 |
| N  | -1.57195 | -2.51929 | 1.54211  |
| N  | 1.17804  | -3.27121 | 1.7509   |
| N  | 1.00362  | -1.87393 | -1.57587 |
| N  | 2.85069  | -1.29191 | -2.92154 |
| N  | 2.42544  | -0.12916 | -0.96518 |
| C  | -1.67627 | -4.49238 | 0.04962  |

|   |          |          |          |
|---|----------|----------|----------|
| H | -1.42185 | -5.26285 | 0.7793   |
| H | -2.28289 | -4.98549 | -0.71817 |
| C | -2.47749 | -3.36907 | 0.70843  |
| H | -2.91659 | -2.71731 | -0.05399 |
| H | -3.29806 | -3.78861 | 1.30426  |
| C | -1.08414 | -3.18446 | 2.79617  |
| H | -1.34615 | -4.24344 | 2.74669  |
| H | -1.61578 | -2.78284 | 3.66476  |
| C | 0.42788  | -3.01843 | 3.00278  |
| H | 0.65732  | -1.9923  | 3.31409  |
| H | 0.7396   | -3.67932 | 3.82356  |
| C | 1.15437  | -4.68765 | 1.28768  |
| H | 0.45926  | -5.25988 | 1.90759  |
| H | 2.13265  | -5.15988 | 1.42559  |
| C | 0.78021  | -4.79305 | -0.1996  |
| H | 1.61825  | -4.43823 | -0.80076 |
| H | 0.60033  | -5.8432  | -0.46815 |
| C | -0.55245 | -3.71624 | -2.01165 |
| H | -1.48129 | -3.15414 | -2.14917 |
| H | -0.65033 | -4.66535 | -2.55559 |
| C | 0.62913  | -2.9092  | -2.55066 |
| H | 1.4742   | -3.58403 | -2.74778 |
| H | 0.33676  | -2.46938 | -3.51405 |
| C | 2.06775  | -1.14289 | -1.82906 |
| H | -2.08237 | -1.67698 | 1.80198  |
| H | 2.14433  | -2.98527 | 1.89372  |
| H | 3.42082  | -0.008   | -0.81077 |
| H | 3.57761  | -0.62336 | -3.14067 |
| H | 2.69314  | -2.01844 | -3.60434 |
| H | 1.84571  | -0.08864 | -0.12837 |

**[Cu<sub>2</sub>(L<sup>1</sup>)<sub>2</sub>(μ-OH)]<sup>3+</sup> Open-shell singlet  
E : -1840.34215898 a.u.**

|    |          |         |          |
|----|----------|---------|----------|
| Cu | 0.       | 2.02525 | 0.19595  |
| O  | 0.       | 0.      | 0.73878  |
| H  | 0.       | 0.      | 1.70976  |
| N  | 0.40871  | 3.95997 | -0.54329 |
| N  | 1.56527  | 2.51129 | 1.5472   |
| N  | -1.18498 | 3.26347 | 1.74926  |
| N  | -0.99881 | 1.8699  | -1.57892 |
| N  | -2.83998 | 1.2899  | -2.93371 |
| N  | -2.42394 | 0.12455 | -0.97714 |
| C  | 1.67262  | 4.48871 | 0.05962  |
| H  | 1.41576  | 5.25743 | 0.79032  |
| H  | 2.28161  | 4.98407 | -0.7049  |
| C  | 2.47263  | 3.36437 | 0.71809  |
| H  | 2.91487  | 2.71486 | -0.04441 |
| H  | 3.2908   | 3.78273 | 1.31809  |
| C  | 1.07365  | 3.17393 | 2.80139  |
| H  | 1.33674  | 4.23278 | 2.75502  |
| H  | 1.60248  | 2.76971 | 3.67051  |
| C  | -0.43924 | 3.00905 | 3.00311  |
| H  | -0.67045 | 1.9828  | 3.31297  |

|    |          |          |          |
|----|----------|----------|----------|
| H  | -0.7527  | 3.66938  | 3.82369  |
| C  | -1.16126 | 4.68097  | 1.28849  |
| H  | -0.46829 | 5.25254  | 1.91153  |
| H  | -2.1403  | 5.15215  | 1.42485  |
| C  | -0.78302 | 4.78887  | -0.19742 |
| H  | -1.61902 | 4.434    | -0.80156 |
| H  | -0.60344 | 5.83954  | -0.46434 |
| C  | 0.55656  | 3.71589  | -2.00638 |
| H  | 1.48706  | 3.15593  | -2.1419  |
| H  | 0.65428  | 4.66588  | -2.54892 |
| C  | -0.62144 | 2.90714  | -2.55078 |
| H  | -1.4669  | 3.58081  | -2.75034 |
| H  | -0.3245  | 2.46892  | -3.51351 |
| C  | -2.06183 | 1.13951  | -1.83788 |
| H  | 2.07687  | 1.66969  | 1.80709  |
| H  | -2.15149 | 2.97618  | 1.88775  |
| H  | -3.42013 | 0.00262  | -0.82886 |
| H  | -3.5667  | 0.62232  | -3.15627 |
| H  | -2.67832 | 2.01614  | -3.61579 |
| H  | -1.85009 | 0.08508  | -0.13683 |
| Cu | 0.       | -2.02525 | 0.19595  |
| N  | -0.40871 | -3.95997 | -0.54329 |
| N  | -1.56527 | -2.51129 | 1.5472   |
| N  | 1.18498  | -3.26347 | 1.74926  |
| N  | 0.99881  | -1.8699  | -1.57892 |
| N  | 2.83998  | -1.2899  | -2.93371 |
| N  | 2.42394  | -0.12455 | -0.97714 |
| C  | -1.67262 | -4.48871 | 0.05962  |
| H  | -1.41576 | -5.25743 | 0.79032  |
| H  | -2.28161 | -4.98407 | -0.7049  |
| C  | -2.47263 | -3.36437 | 0.71809  |
| H  | -2.91487 | -2.71486 | -0.04441 |
| H  | -3.2908  | -3.78273 | 1.31809  |
| C  | -1.07365 | -3.17393 | 2.80139  |
| H  | -1.33674 | -4.23278 | 2.75502  |
| H  | -1.60248 | -2.76971 | 3.67051  |
| C  | 0.43924  | -3.00905 | 3.00311  |
| H  | 0.67045  | -1.9828  | 3.31297  |
| H  | 0.7527   | -3.66938 | 3.82369  |
| C  | 1.16126  | -4.68097 | 1.28849  |
| H  | 0.46829  | -5.25254 | 1.91153  |
| H  | 2.1403   | -5.15215 | 1.42485  |
| C  | 0.78302  | -4.78887 | -0.19742 |
| H  | 1.61902  | -4.434   | -0.80156 |
| H  | 0.60344  | -5.83954 | -0.46434 |
| C  | -0.55656 | -3.71589 | -2.00638 |
| H  | -1.48706 | -3.15593 | -2.1419  |
| H  | -0.65428 | -4.66588 | -2.54892 |
| C  | 0.62144  | -2.90714 | -2.55078 |
| H  | 1.4669   | -3.58081 | -2.75034 |
| H  | 0.3245   | -2.46892 | -3.51351 |
| C  | 2.06183  | -1.13951 | -1.83788 |
| H  | -2.07687 | -1.66969 | 1.80709  |

|   |         |          |          |
|---|---------|----------|----------|
| H | 2.15149 | -2.97618 | 1.88775  |
| H | 3.42013 | -0.00262 | -0.82886 |
| H | 3.5667  | -0.62232 | -3.15627 |
| H | 2.67832 | -2.01614 | -3.61579 |
| H | 1.85009 | -0.08508 | -0.13683 |

**[Cu<sub>2</sub>(L<sup>1</sup>)<sub>2</sub>(OH)<sub>2</sub>]<sup>2+</sup> Triplet  
E : -1916.34166747 a.u.**

|    |          |          |          |
|----|----------|----------|----------|
| O  | 0.9418   | 0.99161  | -1.23907 |
| Cu | -2.47232 | 0.09016  | 0.16493  |
| O  | -0.72944 | 0.48635  | 0.90619  |
| N  | -4.31569 | -0.36626 | -0.79423 |
| N  | -2.02164 | 0.98094  | -1.7327  |
| N  | -3.55305 | 2.09563  | 0.43138  |
| N  | -2.90302 | -1.61018 | 1.25754  |
| N  | -2.77759 | -2.99885 | 3.16266  |
| N  | -1.01224 | -1.59486 | 2.61027  |
| C  | -4.20918 | -0.05157 | -2.25258 |
| H  | -4.76209 | 0.86838  | -2.45171 |
| H  | -4.69391 | -0.83357 | -2.84896 |
| C  | -2.746   | 0.11255  | -2.68701 |
| H  | -2.24022 | -0.85947 | -2.68876 |
| H  | -2.71405 | 0.50126  | -3.71518 |
| C  | -2.4081  | 2.41595  | -1.76829 |
| H  | -3.2853  | 2.52964  | -2.41201 |
| H  | -1.6133  | 3.01015  | -2.23303 |
| C  | -2.69754 | 2.99267  | -0.37011 |
| H  | -1.75821 | 3.0977   | 0.18003  |
| H  | -3.13516 | 3.99488  | -0.49194 |
| C  | -4.95208 | 1.94219  | -0.0261  |
| H  | -5.0691  | 2.42876  | -0.99876 |
| H  | -5.65235 | 2.44863  | 0.64822  |
| C  | -5.34799 | 0.45796  | -0.10594 |
| H  | -5.45299 | 0.06692  | 0.90914  |
| H  | -6.32345 | 0.35055  | -0.60307 |
| C  | -4.50772 | -1.82334 | -0.56581 |
| H  | -3.82658 | -2.34426 | -1.24609 |
| H  | -5.53346 | -2.12601 | -0.82142 |
| C  | -4.17018 | -2.22635 | 0.87142  |
| H  | -4.11838 | -3.3252  | 0.89216  |
| C  | -2.26653 | -2.05769 | 2.32015  |
| H  | -1.00387 | 0.89284  | -1.8462  |
| H  | -3.52483 | 2.38711  | 1.40481  |
| H  | -0.76792 | -1.56124 | 3.59347  |
| H  | -2.18002 | -3.47345 | 3.82507  |
| H  | -3.69599 | -3.39154 | 3.02544  |
| H  | -0.73918 | -0.7614  | 2.04408  |
| H  | -4.98261 | -1.93245 | 1.55368  |
| Cu | 2.57183  | 0.25596  | -0.48877 |
| N  | 4.50898  | -0.51552 | -0.11786 |
| N  | 2.74939  | -0.94621 | -2.23052 |
| N  | 2.00256  | -1.80548 | 0.39362  |
| N  | 3.15412  | 1.6865   | 0.89899  |

|   |         |          |          |    |          |          |          |
|---|---------|----------|----------|----|----------|----------|----------|
| N | 3.05356 | 3.40264  | 2.50829  | C  | -2.4081  | 2.41595  | -1.76829 |
| N | 1.09677 | 2.5934   | 1.58108  | H  | -3.2853  | 2.52964  | -2.41201 |
| C | 5.01838 | -1.22833 | -1.32947 | H  | -1.6133  | 3.01015  | -2.23303 |
| H | 4.97056 | -2.30353 | -1.14658 | C  | -2.69754 | 2.99267  | -0.37011 |
| H | 6.07573 | -0.99235 | -1.49794 | H  | -1.75821 | 3.0977   | 0.18003  |
| C | 4.18911 | -0.86612 | -2.56782 | H  | -3.13516 | 3.99488  | -0.49194 |
| H | 4.39274 | 0.16366  | -2.88021 | C  | -4.95208 | 1.94219  | -0.0261  |
| H | 4.46094 | -1.52396 | -3.40493 | H  | -5.0691  | 2.42876  | -0.99876 |
| C | 2.21365 | -2.31943 | -2.04391 | H  | -5.65235 | 2.44863  | 0.64822  |
| H | 3.05604 | -3.0159  | -2.01108 | C  | -5.34799 | 0.45796  | -0.10594 |
| H | 1.60951 | -2.61545 | -2.90869 | H  | -5.45299 | 0.06692  | 0.90914  |
| C | 1.36481 | -2.45537 | -0.76675 | H  | -6.32345 | 0.35055  | -0.60307 |
| H | 0.40057 | -1.95741 | -0.90684 | C  | -4.50772 | -1.82334 | -0.56581 |
| H | 1.16614 | -3.52491 | -0.59819 | H  | -3.82658 | -2.34426 | -1.24609 |
| C | 3.24411 | -2.43759 | 0.89361  | H  | -5.53346 | -2.12601 | -0.82142 |
| H | 3.54927 | -3.23334 | 0.20727  | C  | -4.17018 | -2.22635 | 0.87142  |
| H | 3.07976 | -2.92565 | 1.86137  | H  | -4.11838 | -3.3252  | 0.89216  |
| C | 4.37598 | -1.40629 | 1.06603  | C  | -2.26653 | -2.05769 | 2.32015  |
| H | 4.1469  | -0.77257 | 1.92564  | H  | -1.00387 | 0.89284  | -1.8462  |
| H | 5.32615 | -1.91959 | 1.27518  | H  | -3.52483 | 2.38711  | 1.40481  |
| C | 5.2972  | 0.71266  | 0.14893  | H  | -0.76792 | -1.56124 | 3.59347  |
| H | 5.40973 | 1.22715  | -0.81107 | H  | -2.18002 | -3.47345 | 3.82507  |
| H | 6.30542 | 0.46267  | 0.50999  | H  | -3.69599 | -3.39154 | 3.02544  |
| C | 4.60206 | 1.64454  | 1.14342  | H  | -0.73918 | -0.7614  | 2.04408  |
| H | 5.07594 | 2.62937  | 1.01176  | H  | -4.98261 | -1.93245 | 1.55368  |
| C | 2.45663 | 2.53252  | 1.6351   | Cu | 2.57183  | 0.25596  | -0.48877 |
| H | 2.18466 | -0.42217 | -2.89599 | N  | 4.50898  | -0.51552 | -0.11786 |
| H | 1.31257 | -1.72063 | 1.13698  | N  | 2.74939  | -0.94621 | -2.23052 |
| H | 0.6442  | 3.20425  | 2.24888  | N  | 2.00256  | -1.80548 | 0.39362  |
| H | 2.49577 | 4.10856  | 2.96978  | N  | 3.15412  | 1.6865   | 0.89899  |
| H | 4.02751 | 3.64477  | 2.40238  | N  | 3.05356  | 3.40264  | 2.50829  |
| H | 0.52337 | 1.76982  | 1.34515  | N  | 1.09677  | 2.5934   | 1.58108  |
| H | 4.80793 | 1.33014  | 2.17667  | C  | 5.01838  | -1.22833 | -1.32947 |
| H | 0.99635 | 1.9555   | -1.13509 | H  | 4.97056  | -2.30353 | -1.14658 |
| H | -0.1442 | 0.5163   | 0.11209  | H  | 6.07573  | -0.99235 | -1.49794 |

**[Cu<sub>2</sub>(L<sup>1</sup>)<sub>2</sub>(OH)<sub>2</sub>]<sup>2+</sup> Open-shell singlet  
E : -1916.34165760 a.u.**

|    |          |          |          |   |         |          |          |
|----|----------|----------|----------|---|---------|----------|----------|
| O  | 0.9418   | 0.99161  | -1.23907 | C | 4.18911 | -0.86612 | -2.56782 |
| Cu | -2.47232 | 0.09016  | 0.16493  | H | 4.39274 | 0.16366  | -2.88021 |
| O  | -0.72944 | 0.48635  | 0.90619  | H | 4.46094 | -1.52396 | -3.40493 |
| N  | -4.31569 | -0.36626 | -0.79423 | C | 2.21365 | -2.31943 | -2.04391 |
| N  | -2.02164 | 0.98094  | -1.7327  | H | 3.05604 | -3.0159  | -2.01108 |
| N  | -3.55305 | 2.09563  | 0.43138  | H | 1.60951 | -2.61545 | -2.90869 |
| N  | -2.90302 | -1.61018 | 1.25754  | C | 1.36481 | -2.45537 | -0.76675 |
| N  | -2.77759 | -2.99885 | 3.16266  | H | 0.40057 | -1.95741 | -0.90684 |
| N  | -1.01224 | -1.59486 | 2.61027  | H | 1.16614 | -3.52491 | -0.59819 |
| C  | -4.20918 | -0.05157 | -2.25258 | C | 3.24411 | -2.43759 | 0.89361  |
| H  | -4.76209 | 0.86838  | -2.45171 | H | 3.54927 | -3.23334 | 0.20727  |
| H  | -4.69391 | -0.83357 | -2.84896 | H | 3.07976 | -2.92565 | 1.86137  |
| C  | -2.746   | 0.11255  | -2.68701 | C | 4.37598 | -1.40629 | 1.06603  |
| H  | -2.24022 | -0.85947 | -2.68876 | H | 4.1469  | -0.77257 | 1.92564  |
| H  | -2.71405 | 0.50126  | -3.71518 | H | 5.32615 | -1.91959 | 1.27518  |
|    |          |          |          | C | 5.2972  | 0.71266  | 0.14893  |
|    |          |          |          | H | 5.40973 | 1.22715  | -0.81107 |
|    |          |          |          | H | 6.30542 | 0.46267  | 0.50999  |

|   |         |          |          |
|---|---------|----------|----------|
| C | 4.60206 | 1.64454  | 1.14342  |
| H | 5.07594 | 2.62937  | 1.01176  |
| C | 2.45663 | 2.53252  | 1.6351   |
| H | 2.18466 | -0.42217 | -2.89599 |
| H | 1.31257 | -1.72063 | 1.13698  |
| H | 0.6442  | 3.20425  | 2.24888  |
| H | 2.49577 | 4.10856  | 2.96978  |
| H | 4.02751 | 3.64477  | 2.40238  |
| H | 0.52337 | 1.76982  | 1.34515  |
| H | 4.80793 | 1.33014  | 2.17667  |
| H | 0.99635 | 1.9555   | -1.13509 |
| H | -0.1442 | 0.5163   | 0.11209  |

**[Cu<sub>2</sub>(L<sup>1</sup>)<sub>2</sub>(μ-OH)(OH)]<sup>2+</sup>**

**E : -1916.26798746 a.u.**

|    |          |          |          |
|----|----------|----------|----------|
| O  | 1.21222  | 0.87425  | -1.69182 |
| Cu | -2.06869 | -0.05579 | -0.0141  |
| O  | -0.07007 | -0.5491  | 0.37731  |
| N  | -3.90979 | -0.12424 | -1.18952 |
| N  | -1.46234 | 1.25497  | -1.50459 |
| N  | -3.12901 | 1.88083  | 0.72345  |
| N  | -2.82824 | -1.77283 | 0.80933  |
| N  | -3.34683 | -3.2102  | 2.61485  |
| N  | -1.41238 | -1.94102 | 2.64819  |
| C  | -3.62427 | 0.51451  | -2.50394 |
| H  | -4.12985 | 1.48239  | -2.53392 |
| H  | -4.05013 | -0.07692 | -3.32463 |
| C  | -2.11391 | 0.70051  | -2.71511 |
| H  | -1.63769 | -0.2652  | -2.92003 |
| H  | -1.94319 | 1.33924  | -3.59394 |
| C  | -1.78464 | 2.67616  | -1.22213 |
| H  | -2.58831 | 3.00308  | -1.88921 |
| H  | -0.91478 | 3.29974  | -1.45657 |
| C  | -2.17893 | 2.91172  | 0.24389  |
| H  | -1.29532 | 2.8432   | 0.88367  |
| H  | -2.58806 | 3.92931  | 0.33719  |
| C  | -4.47668 | 1.94648  | 0.10951  |
| H  | -4.46129 | 2.67236  | -0.70822 |
| H  | -5.22072 | 2.31603  | 0.82473  |
| C  | -4.94881 | 0.57384  | -0.40191 |
| H  | -5.19253 | -0.05269 | 0.45862  |
| H  | -5.87329 | 0.69712  | -0.98732 |
| C  | -4.11617 | -1.58563 | -1.28955 |
| H  | -3.34375 | -1.97451 | -1.96142 |
| H  | -5.09307 | -1.82462 | -1.7381  |
| C  | -3.99564 | -2.27809 | 0.07305  |
| H  | -3.91378 | -3.35961 | -0.11036 |
| C  | -2.56218 | -2.29429 | 1.98387  |
| H  | -0.42214 | 1.11683  | -1.56509 |
| H  | -3.20754 | 1.95732  | 1.73438  |
| H  | -1.43407 | -1.92995 | 3.66061  |
| H  | -2.97325 | -3.76325 | 3.37461  |
| H  | -4.17764 | -3.57457 | 2.17368  |

|    |          |          |          |
|----|----------|----------|----------|
| H  | -0.86965 | -1.2064  | 2.19825  |
| H  | -4.9183  | -2.11987 | 0.65041  |
| Cu | 1.87152  | -0.21055 | -0.221   |
| N  | 3.99186  | 0.27842  | -0.45034 |
| N  | 2.60663  | -1.96105 | -1.81037 |
| N  | 2.66239  | -1.68977 | 1.04001  |
| N  | 2.21982  | 1.91094  | 0.9521   |
| N  | 1.93676  | 3.66308  | 2.5402   |
| N  | 0.41555  | 1.90925  | 2.40901  |
| C  | 4.64789  | -0.5221  | -1.5218  |
| H  | 5.29773  | -1.26161 | -1.04642 |
| H  | 5.31036  | 0.12218  | -2.11255 |
| C  | 3.69281  | -1.23738 | -2.49386 |
| H  | 3.22464  | -0.50331 | -3.15652 |
| H  | 4.30917  | -1.89454 | -3.12693 |
| C  | 2.99066  | -3.12747 | -0.99523 |
| H  | 4.0813   | -3.21455 | -0.96428 |
| H  | 2.63285  | -4.0642  | -1.43891 |
| C  | 2.41991  | -3.02869 | 0.43023  |
| H  | 1.3363   | -3.18252 | 0.40832  |
| H  | 2.84983  | -3.82223 | 1.05777  |
| C  | 4.11037  | -1.44095 | 1.34454  |
| H  | 4.70037  | -2.21545 | 0.85034  |
| H  | 4.29522  | -1.55076 | 2.41844  |
| C  | 4.53987  | -0.04601 | 0.89332  |
| H  | 4.14811  | 0.68318  | 1.59912  |
| H  | 5.63777  | 0.03096  | 0.90099  |
| C  | 4.00784  | 1.7351   | -0.74884 |
| H  | 3.44496  | 1.86316  | -1.67548 |
| H  | 5.0419   | 2.07435  | -0.91128 |
| C  | 3.36917  | 2.58704  | 0.3642   |
| H  | 3.09083  | 3.54911  | -0.09221 |
| C  | 1.58559  | 2.49153  | 1.9167   |
| H  | 1.90112  | -2.22458 | -2.49232 |
| H  | 2.12405  | -1.62979 | 1.90233  |
| H  | 0.32216  | 1.91154  | 3.42017  |
| H  | 1.22961  | 4.18659  | 3.03953  |
| H  | 2.68768  | 4.22135  | 2.16061  |
| H  | 0.24522  | 1.00082  | 1.98479  |
| H  | 4.1323   | 2.81102  | 1.12722  |
| H  | 1.357    | 0.38165  | -2.51603 |
| H  | -0.15938 | -1.50504 | 0.21202  |

**[Cu(L<sup>3</sup>H)(OH)(H<sub>2</sub>O)]<sup>2+</sup>**

**E: -1113.75556652 a.u.**

|    |          |          |          |
|----|----------|----------|----------|
| O  | 0.32699  | 1.60758  | -1.04805 |
| O  | -1.36137 | 2.97855  | 0.4296   |
| Cu | -1.1921  | 0.88516  | -0.0856  |
| N  | -0.49875 | -1.15678 | 0.23178  |
| N  | -2.65939 | -0.11613 | -1.46278 |
| N  | -2.60093 | 0.37092  | 1.31913  |
| N  | 3.69631  | -0.01039 | -0.5306  |
| N  | 4.88091  | 1.44878  | 0.8365   |

|   |          |          |          |
|---|----------|----------|----------|
| N | 3.03645  | 2.19754  | -0.38624 |
| C | -1.26472 | -2.05337 | -0.68454 |
| H | -2.03891 | -2.56692 | -0.11093 |
| H | -0.61167 | -2.84062 | -1.07581 |
| C | -1.89645 | -1.31697 | -1.8793  |
| H | -1.11579 | -0.9748  | -2.5665  |
| H | -2.52306 | -2.0352  | -2.42605 |
| C | -3.89863 | -0.38569 | -0.68111 |
| H | -3.96643 | -1.45684 | -0.47032 |
| H | -4.79016 | -0.13536 | -1.26497 |
| C | -3.92149 | 0.42616  | 0.62266  |
| H | -4.11618 | 1.48061  | 0.40296  |
| H | -4.72594 | 0.07102  | 1.27891  |
| C | -2.27746 | -0.94172 | 1.96423  |
| H | -2.98199 | -1.68977 | 1.59442  |
| H | -2.42958 | -0.8809  | 3.0465   |
| C | -0.83167 | -1.35522 | 1.66936  |
| H | -0.14031 | -0.73268 | 2.24832  |
| H | -0.67761 | -2.39699 | 1.9823   |
| C | 0.96496  | -1.16105 | -0.04281 |
| H | 1.36816  | -0.27044 | 0.44062  |
| H | 1.0552   | -0.99442 | -1.12017 |
| C | 3.88083  | 1.22084  | -0.0321  |
| H | -2.88928 | 0.42412  | -2.29425 |
| H | -2.58082 | 1.10729  | 2.02538  |
| H | 3.29158  | 3.16671  | -0.24328 |
| H | 4.94659  | 2.32573  | 1.33764  |
| H | 5.69856  | 0.85244  | 0.8584   |
| H | 2.06791  | 1.98802  | -0.70164 |
| H | 0.14791  | 1.7244   | -1.99509 |
| C | 1.7774   | -2.39735 | 0.37791  |
| H | 1.25889  | -3.31899 | 0.08611  |
| H | 1.87935  | -2.43068 | 1.46982  |
| C | 3.17916  | -2.43608 | -0.2731  |
| H | 3.07928  | -2.50858 | -1.36591 |
| H | 3.67764  | -3.36071 | 0.03717  |
| C | 4.14433  | -1.2868  | 0.06394  |
| H | 4.21409  | -1.14592 | 1.14827  |
| H | 5.14237  | -1.54007 | -0.31207 |
| H | 3.14161  | -0.05895 | -1.37594 |
| H | -0.60434 | 3.17966  | -0.16339 |
| H | -2.05111 | 3.64609  | 0.27393  |

### BNP

**E : -1515.25559363 a.u.**

|   |         |          |          |
|---|---------|----------|----------|
| O | 5.60686 | -1.90979 | 1.27135  |
| N | 5.05495 | -1.96006 | 0.16221  |
| C | 3.95904 | -1.05024 | -0.10817 |
| O | 5.39812 | -2.75342 | -0.72801 |
| C | 3.55796 | -0.13655 | 0.87478  |
| C | 3.31713 | -1.09535 | -1.35378 |
| C | 2.51145 | 0.73911  | 0.62374  |
| H | 4.07589 | -0.11812 | 1.82616  |

|   |          |          |          |
|---|----------|----------|----------|
| C | 2.27247  | -0.22343 | -1.60417 |
| H | 3.6432   | -1.81013 | -2.09937 |
| C | 1.85502  | 0.70102  | -0.62365 |
| H | 2.20347  | 1.47203  | 1.35948  |
| H | 1.75182  | -0.23236 | -2.55603 |
| O | 0.82652  | 1.49991  | -0.97646 |
| P | -0.0003  | 2.63373  | -0.00046 |
| O | 0.95202  | 3.2938   | 0.93776  |
| O | -0.95222 | 3.29331  | -0.9395  |
| O | -0.82785 | 1.50186  | 0.97647  |
| C | -1.85567 | 0.702    | 0.62381  |
| C | -2.51137 | 0.73896  | -0.62397 |
| C | -2.27315 | -0.22195 | 1.60477  |
| C | -3.55735 | -0.13736 | -0.87499 |
| H | -2.20315 | 1.47156  | -1.35996 |
| C | -3.31746 | -1.09431 | 1.3545   |
| H | -1.75279 | -0.23012 | 2.55681  |
| C | -3.9587  | -1.05033 | 0.10849  |
| H | -4.07468 | -0.11991 | -1.82671 |
| H | -3.64365 | -1.80869 | 2.10041  |
| N | -5.05431 | -1.96061 | -0.16168 |
| O | -5.39921 | -2.75172 | 0.72983  |
| O | -5.60378 | -1.91334 | -1.27215 |

### OH<sup>-</sup>

**E : -75.97878999 a.u.**

|   |    |    |          |
|---|----|----|----------|
| O | 0. | 0. | 0.10831  |
| H | 0. | 0. | -0.86646 |

### H<sub>2</sub>O

**E : -76.47252534 a.u.**

|   |    |          |          |
|---|----|----------|----------|
| O | 0. | 0.       | 0.11724  |
| H | 0. | 0.77158  | -0.46895 |
| H | 0. | -0.77158 | -0.46895 |

### L<sup>1</sup>-2OH-<sup>3</sup>RC

**E : -3431.61626639 a.u.**

|   |          |         |          |
|---|----------|---------|----------|
| O | -2.58578 | 1.33296 | -1.26569 |
| O | 7.27031  | 5.3486  | -0.70875 |
| N | 7.3097   | 4.45362 | -1.55787 |
| C | 6.29322  | 3.40003 | -1.49051 |
| O | 8.14776  | 4.38985 | -2.4603  |
| C | 5.33653  | 3.4424  | -0.47581 |
| C | 6.30303  | 2.37831 | -2.44345 |
| C | 4.36599  | 2.44858 | -0.40915 |
| H | 5.36232  | 4.24668 | 0.24918  |
| C | 5.33162  | 1.38866 | -2.37623 |
| H | 7.06004  | 2.3725  | -3.21802 |
| C | 4.36295  | 1.42269 | -1.36384 |
| H | 3.61531  | 2.47046 | 0.36998  |
| H | 5.30622  | 0.58056 | -3.09956 |
| O | 3.46686  | 0.38087 | -1.36112 |
| P | 1.96864  | 0.34779 | -0.64754 |

|    |          |          |          |                                         |          |          |          |
|----|----------|----------|----------|-----------------------------------------|----------|----------|----------|
| O  | 1.30761  | 1.69036  | -0.74319 | H                                       | -1.8923  | -1.94679 | 1.59891  |
| O  | 1.34272  | -0.934   | -1.10499 | H                                       | 0.15975  | -5.43834 | -0.30576 |
| O  | 2.3731   | 0.21292  | 0.98633  | Cu                                      | -2.77657 | 2.16674  | 0.47915  |
| C  | 2.84637  | -0.90772 | 1.5995   | N                                       | -3.41926 | 4.29907  | 0.88582  |
| C  | 3.54268  | -1.92922 | 0.93118  | N                                       | -0.92142 | 3.02593  | 0.28212  |
| C  | 2.63414  | -0.99161 | 2.986    | N                                       | -2.27843 | 2.35666  | 2.63018  |
| C  | 3.99032  | -3.03641 | 1.64366  | N                                       | -4.82407 | 1.90986  | 0.53744  |
| H  | 3.73144  | -1.85072 | -0.13202 | N                                       | -6.86617 | 0.88133  | 1.11937  |
| C  | 3.07998  | -2.09523 | 3.69997  | N                                       | -4.8863  | -0.32797 | 1.18629  |
| H  | 2.12166  | -0.17575 | 3.48519  | C                                       | -2.27478 | 5.13281  | 0.45571  |
| C  | 3.74211  | -3.11972 | 3.0165   | H                                       | -1.80689 | 5.55495  | 1.35007  |
| H  | 4.53538  | -3.83256 | 1.1503   | H                                       | -2.61153 | 5.99066  | -0.14291 |
| H  | 2.92617  | -2.17489 | 4.76946  | C                                       | -1.23309 | 4.33031  | -0.35238 |
| N  | 4.16494  | -4.31187 | 3.75102  | H                                       | -1.61555 | 4.09922  | -1.35105 |
| O  | 3.90085  | -4.37142 | 4.95629  | H                                       | -0.32468 | 4.93609  | -0.47834 |
| O  | 4.74045  | -5.20527 | 3.12304  | C                                       | -0.17394 | 3.09623  | 1.56427  |
| Cu | -1.51065 | -2.32195 | -1.06078 | H                                       | -0.16466 | 4.12739  | 1.93     |
| O  | -2.4257  | -1.10118 | 0.16561  | H                                       | 0.86249  | 2.79841  | 1.3851   |
| N  | -0.58191 | -3.60387 | -2.48267 | C                                       | -0.80561 | 2.15927  | 2.59797  |
| N  | -1.76828 | -1.07377 | -2.75454 | H                                       | -0.62442 | 1.11986  | 2.30533  |
| N  | -3.40464 | -3.34336 | -2.05756 | H                                       | -0.34732 | 2.32309  | 3.58457  |
| N  | -0.48794 | -3.50322 | 0.27158  | C                                       | -2.70171 | 3.6647   | 3.19426  |
| N  | 0.04198  | -4.42468 | 2.37941  | H                                       | -1.81546 | 4.29322  | 3.31284  |
| N  | -1.54649 | -2.73126 | 2.17836  | H                                       | -3.12097 | 3.53692  | 4.1991   |
| C  | -0.36259 | -2.84791 | -3.75404 | C                                       | -3.74554 | 4.38369  | 2.3144   |
| H  | -1.06525 | -3.22468 | -4.50189 | H                                       | -4.71353 | 3.90498  | 2.46936  |
| H  | 0.64246  | -3.04888 | -4.14383 | H                                       | -3.8451  | 5.42624  | 2.65815  |
| C  | -0.54725 | -1.33747 | -3.55226 | C                                       | -4.57787 | 4.3191   | -0.02074 |
| H  | 0.2925   | -0.93538 | -2.98227 | H                                       | -4.18771 | 4.2244   | -1.03967 |
| H  | -0.58481 | -0.83918 | -4.5324  | H                                       | -5.13661 | 5.26866  | 0.03121  |
| C  | -3.04498 | -1.31915 | -3.46774 | C                                       | -5.54892 | 3.15488  | 0.26297  |
| H  | -2.82708 | -1.81822 | -4.41714 | H                                       | -6.20701 | 3.05787  | -0.61489 |
| H  | -3.52131 | -0.36643 | -3.7287  | C                                       | -5.50606 | 0.84817  | 0.90921  |
| C  | -4.0441  | -2.16146 | -2.65283 | H                                       | -0.34968 | 2.46044  | -0.36445 |
| H  | -4.42375 | -1.56425 | -1.81841 | H                                       | -2.71525 | 1.59614  | 3.14604  |
| H  | -4.89423 | -2.4165  | -3.30724 | H                                       | -5.46203 | -1.1154  | 1.45184  |
| C  | -2.92289 | -4.38327 | -2.9832  | H                                       | -7.38225 | 0.0136   | 1.16165  |
| H  | -3.00616 | -4.01825 | -4.01138 | H                                       | -7.40098 | 1.67418  | 0.79943  |
| H  | -3.54217 | -5.28802 | -2.93465 | H                                       | -3.95495 | -0.58503 | 0.78096  |
| C  | -1.47042 | -4.77873 | -2.66267 | H                                       | -6.19487 | 3.4271   | 1.11172  |
| H  | -1.46373 | -5.34025 | -1.7256  | H                                       | -3.50124 | 1.25501  | -1.57844 |
| H  | -1.07894 | -5.44328 | -3.44906 | H                                       | -2.30743 | -0.23606 | -0.28673 |
| C  | 0.70065  | -3.95368 | -1.81801 |                                         |          |          |          |
| H  | 1.30943  | -3.04736 | -1.8213  |                                         |          |          |          |
| H  | 1.22353  | -4.74429 | -2.37793 | <b>L<sup>1</sup>-2OH-<sup>3</sup>TS</b> |          |          |          |
| C  | 0.4849   | -4.38769 | -0.36417 | <b>E : -3431.59989318 a.u.</b>          |          |          |          |
| H  | 1.47149  | -4.33011 | 0.12027  | O                                       | -1.44958 | -0.00386 | -0.91281 |
| C  | -0.62942 | -3.53763 | 1.57482  | O                                       | -3.51274 | 6.92981  | 1.07539  |
| H  | -1.76598 | -0.11513 | -2.38007 | N                                       | -3.51112 | 6.4316   | -0.05279 |
| H  | -3.99705 | -3.73765 | -1.33349 | C                                       | -2.59025 | 5.31919  | -0.30996 |
| H  | -1.46776 | -2.58113 | 3.17419  | O                                       | -4.24545 | 6.79683  | -0.97474 |
| H  | 0.05189  | -4.27197 | 3.37863  | C                                       | -1.74573 | 4.88139  | 0.71373  |
| H  | 0.86908  | -4.88044 | 2.02318  | C                                       | -2.58784 | 4.71786  | -1.57091 |
|    |          |          |          | C                                       | -0.90089 | 3.79919  | 0.48763  |

|    |          |          |          |    |          |          |          |
|----|----------|----------|----------|----|----------|----------|----------|
| H  | -1.75123 | 5.39574  | 1.6673   | C  | 3.70296  | -0.57009 | 1.81668  |
| C  | -1.74844 | 3.63192  | -1.79387 | H  | 3.63216  | 0.50359  | 1.99207  |
| H  | -3.23594 | 5.10007  | -2.35022 | C  | 1.6016   | -0.7781  | 2.93579  |
| C  | -0.92159 | 3.16303  | -0.76284 | H  | 0.85254  | -2.96582 | -1.81683 |
| H  | -0.21596 | 3.44316  | 1.24774  | H  | 2.64386  | -5.09847 | 1.54204  |
| H  | -1.71169 | 3.14273  | -2.76181 | H  | 0.13245  | -1.24358 | 4.27809  |
| O  | -0.11099 | 2.09728  | -1.05564 | H  | 0.85412  | 0.80546  | 3.93349  |
| P  | 0.04587  | 0.75655  | -0.09596 | H  | 1.75335  | 1.19388  | 2.55159  |
| O  | -0.59783 | 0.81721  | 1.27005  | H  | 0.89697  | -2.56945 | 3.56903  |
| O  | 1.06813  | -0.18169 | -0.67252 | H  | 4.46678  | -0.94817 | 2.51147  |
| O  | 1.68438  | 1.95859  | 0.93799  | Cu | -2.95694 | -1.05271 | -0.09541 |
| C  | 2.7422   | 2.53123  | 0.40849  | N  | -5.12732 | -0.77109 | -0.47474 |
| C  | 3.02425  | 2.50829  | -0.98984 | N  | -3.26522 | 0.43983  | 1.25944  |
| C  | 3.68182  | 3.19904  | 1.24931  | N  | -3.78093 | -2.28109 | 1.56005  |
| C  | 4.17476  | 3.08697  | -1.49896 | N  | -3.14671 | -2.26068 | -1.72111 |
| H  | 2.31859  | 2.0291   | -1.6571  | N  | -2.86334 | -4.20469 | -3.027   |
| C  | 4.83242  | 3.77523  | 0.74146  | N  | -1.35161 | -3.71722 | -1.34614 |
| H  | 3.46774  | 3.25736  | 2.31354  | C  | -5.50779 | 0.50535  | 0.18076  |
| C  | 5.08742  | 3.70988  | -0.63624 | H  | -6.12057 | 0.27004  | 1.05592  |
| H  | 4.38537  | 3.0671   | -2.56216 | H  | -6.13921 | 1.1151   | -0.47868 |
| H  | 5.54146  | 4.27754  | 1.38923  | C  | -4.26584 | 1.31326  | 0.60534  |
| N  | 6.30382  | 4.28169  | -1.17119 | H  | -3.7742  | 1.75311  | -0.2679  |
| O  | 7.08882  | 4.83463  | -0.3877  | H  | -4.56586 | 2.1428   | 1.2606   |
| O  | 6.51216  | 4.18516  | -2.39041 | C  | -3.6025  | -0.05053 | 2.61572  |
| Cu | 1.92891  | -2.51759 | 0.46955  | H  | -4.66237 | 0.13329  | 2.81338  |
| O  | 0.05938  | -2.98182 | 0.81953  | H  | -3.03959 | 0.5135   | 3.36791  |
| N  | 3.94702  | -2.15394 | -0.09428 | C  | -3.27725 | -1.54384 | 2.74754  |
| N  | 1.81728  | -3.17523 | -1.56836 | H  | -2.19215 | -1.68174 | 2.77498  |
| N  | 2.86239  | -4.70687 | 0.63129  | H  | -3.69808 | -1.93742 | 3.68464  |
| N  | 2.451    | -1.30048 | 2.08362  | C  | -5.26251 | -2.35027 | 1.46685  |
| N  | 1.62217  | 0.52006  | 3.3381   | H  | -5.68921 | -1.68956 | 2.22615  |
| N  | 0.6107   | -1.60287 | 3.46066  | H  | -5.61921 | -3.35882 | 1.70513  |
| C  | 4.10403  | -2.25657 | -1.57396 | C  | -5.79566 | -1.96395 | 0.06969  |
| H  | 4.65284  | -3.17313 | -1.80601 | H  | -5.61145 | -2.79519 | -0.61277 |
| H  | 4.71523  | -1.42713 | -1.94871 | H  | -6.88719 | -1.83058 | 0.12918  |
| C  | 2.74102  | -2.25472 | -2.2734  | C  | -5.07354 | -0.70781 | -1.94821 |
| H  | 2.29118  | -1.26155 | -2.21713 | H  | -4.5514  | 0.21835  | -2.2095  |
| H  | 2.86789  | -2.52846 | -3.33156 | H  | -6.078   | -0.65753 | -2.39834 |
| C  | 2.10139  | -4.61781 | -1.73965 | C  | -4.31641 | -1.91135 | -2.54022 |
| H  | 3.07505  | -4.72523 | -2.22655 | H  | -4.02585 | -1.64607 | -3.56799 |
| H  | 1.37575  | -5.07877 | -2.42236 | C  | -2.47387 | -3.34973 | -2.01992 |
| C  | 2.09425  | -5.39841 | -0.41028 | H  | -2.31196 | 0.85867  | 1.27408  |
| H  | 1.06959  | -5.47398 | -0.03132 | H  | -3.37942 | -3.21609 | 1.54895  |
| H  | 2.45756  | -6.41964 | -0.6132  | H  | -1.13267 | -4.70608 | -1.36722 |
| C  | 4.31811  | -4.58709 | 0.43008  | H  | -2.16908 | -4.83228 | -3.41063 |
| H  | 4.57458  | -4.94079 | -0.57337 | H  | -3.54729 | -3.89355 | -3.70102 |
| H  | 4.87524  | -5.22884 | 1.12421  | H  | -0.9808  | -3.24449 | -0.47365 |
| C  | 4.78742  | -3.13573 | 0.63564  | H  | -5.00494 | -2.76603 | -2.61406 |
| H  | 4.71768  | -2.89601 | 1.69825  | H  | -1.15834 | -0.3986  | -1.75028 |
| H  | 5.84372  | -3.03624 | 0.34121  | H  | -0.21567 | -2.35925 | 1.51236  |
| C  | 4.14977  | -0.75473 | 0.37108  |    |          |          |          |
| H  | 3.54103  | -0.11748 | -0.2729  |    |          |          |          |
| H  | 5.20413  | -0.46107 | 0.25875  |    |          |          |          |

**L<sup>1</sup>-2OH-<sup>3</sup>PC**  
**E : -3431.61885440 a.u.**



|    |          |          |          |    |          |          |          |
|----|----------|----------|----------|----|----------|----------|----------|
| O  | -1.67071 | 1.13081  | -1.80067 | H  | 0.12949  | -6.613   | -0.50804 |
| O  | 2.55188  | 6.97537  | 0.11519  | H  | 0.75532  | -6.67379 | 1.12288  |
| N  | 1.87538  | 6.70999  | -0.88152 | C  | 1.61242  | -5.08156 | -0.0407  |
| C  | 1.62812  | 5.29479  | -1.18538 | H  | 2.01562  | -4.63899 | 0.87166  |
| O  | 1.38286  | 7.55571  | -1.63123 | H  | 2.40923  | -5.68958 | -0.49719 |
| C  | 2.13912  | 4.31713  | -0.32781 | C  | 2.23739  | -2.87666 | -0.98426 |
| C  | 0.88381  | 4.96575  | -2.32043 | H  | 1.86682  | -2.14806 | -1.70782 |
| C  | 1.88553  | 2.97717  | -0.60213 | H  | 3.20743  | -3.26407 | -1.33107 |
| H  | 2.72205  | 4.61302  | 0.53578  | C  | 2.39895  | -2.19319 | 0.38358  |
| C  | 0.63604  | 3.62413  | -2.59283 | H  | 2.79261  | -1.18414 | 0.2122   |
| H  | 0.51212  | 5.75175  | -2.9666  | C  | 1.05569  | -1.65153 | 2.28659  |
| C  | 1.12712  | 2.63725  | -1.72961 | H  | -2.22284 | -3.15589 | -1.82947 |
| H  | 2.25524  | 2.19304  | 0.04939  | H  | -0.82111 | -5.17897 | 1.78764  |
| H  | 0.06352  | 3.32665  | -3.46524 | H  | -0.11948 | -1.74354 | 3.96155  |
| O  | 0.89219  | 1.31372  | -2.03564 | H  | 1.92711  | -0.54994 | 3.73476  |
| P  | -0.27322 | 0.44344  | -1.22881 | H  | 2.93102  | -0.80841 | 2.41543  |
| O  | -0.22883 | 0.76307  | 0.24523  | H  | -0.95237 | -1.9693  | 2.44436  |
| O  | -0.16703 | -0.96899 | -1.748   | H  | 3.14548  | -2.72509 | 0.99281  |
| O  | 4.22053  | 0.324    | 1.42835  | Cu | -3.70249 | 0.79888  | 0.55176  |
| C  | 5.44778  | 0.31798  | 1.11969  | N  | -5.03337 | 2.60482  | 0.41255  |
| C  | 5.88897  | 0.74734  | -0.19329 | N  | -2.35548 | 2.16393  | 1.34565  |
| C  | 6.46147  | -0.13492 | 2.05201  | N  | -4.49651 | 0.82634  | 2.66846  |
| C  | 7.21461  | 0.68409  | -0.55014 | N  | -4.86898 | 0.0425   | -0.90514 |
| H  | 5.13413  | 1.10638  | -0.88457 | N  | -6.14391 | -1.65221 | -1.9605  |
| C  | 7.78573  | -0.18477 | 1.68924  | N  | -4.16603 | -2.1947  | -0.88146 |
| H  | 6.13682  | -0.4347  | 3.0429   | C  | -4.1785  | 3.76937  | 0.7121   |
| C  | 8.15139  | 0.21201  | 0.38892  | H  | -4.43155 | 4.13342  | 1.71291  |
| H  | 7.55678  | 0.98426  | -1.53243 | H  | -4.38866 | 4.60482  | 0.02803  |
| H  | 8.55313  | -0.52593 | 2.37281  | C  | -2.67333 | 3.4267   | 0.64244  |
| N  | 9.55896  | 0.11922  | -0.00504 | H  | -2.36431 | 3.28831  | -0.39818 |
| O  | 10.36897 | -0.2535  | 0.84675  | H  | -2.10025 | 4.27591  | 1.04707  |
| O  | 9.84905  | 0.42075  | -1.16809 | C  | -2.42894 | 2.22783  | 2.82151  |
| Cu | -0.40701 | -2.95007 | -0.02281 | H  | -2.87237 | 3.18519  | 3.1177   |
| O  | -1.91922 | -1.9924  | 0.79286  | H  | -1.42287 | 2.20711  | 3.2578   |
| N  | 1.22538  | -3.96657 | -0.93926 | C  | -3.24241 | 1.06231  | 3.41637  |
| N  | -1.47924 | -3.83059 | -1.64729 | H  | -2.6539  | 0.14118  | 3.33949  |
| N  | -0.73901 | -5.18696 | 0.77571  | H  | -3.4218  | 1.26302  | 4.48539  |
| N  | 1.11419  | -2.1634  | 1.08483  | C  | -5.52137 | 1.89113  | 2.77182  |
| N  | 2.14748  | -1.16775 | 2.96273  | H  | -5.0842  | 2.75145  | 3.28879  |
| N  | -0.14232 | -1.60335 | 2.95855  | H  | -6.36643 | 1.56412  | 3.392    |
| C  | 0.83437  | -4.43475 | -2.29838 | C  | -6.0837  | 2.3285   | 1.39905  |
| H  | 0.75393  | -5.52506 | -2.27857 | H  | -6.70311 | 1.51553  | 1.00794  |
| H  | 1.62079  | -4.19761 | -3.02529 | H  | -6.75106 | 3.19529  | 1.55441  |
| C  | -0.49275 | -3.80893 | -2.75508 | C  | -5.41888 | 2.47994  | -0.9985  |
| H  | -0.34273 | -2.76002 | -3.01315 | H  | -4.54745 | 2.77741  | -1.59142 |
| H  | -0.86276 | -4.34568 | -3.64163 | H  | -6.24739 | 3.15899  | -1.26867 |
| C  | -2.05089 | -5.16311 | -1.34058 | C  | -5.81908 | 1.04669  | -1.40046 |
| H  | -1.48465 | -5.91893 | -1.89368 | H  | -5.87899 | 1.03578  | -2.50101 |
| H  | -3.08315 | -5.23598 | -1.70668 | C  | -5.05609 | -1.206   | -1.23778 |
| C  | -2.03534 | -5.50042 | 0.16257  | H  | -1.44028 | 1.80773  | 1.03256  |
| H  | -2.78123 | -4.89224 | 0.68604  | H  | -4.88705 | -0.07127 | 2.94252  |
| H  | -2.32675 | -6.55798 | 0.27759  | H  | -4.60846 | -3.08077 | -0.65902 |
| C  | 0.42185  | -5.98282 | 0.33812  | H  | -6.03181 | -2.50526 | -2.49316 |

|   |          |          |          |
|---|----------|----------|----------|
| H | -6.74811 | -0.97089 | -2.39743 |
| H | -3.39267 | -1.96585 | -0.21386 |
| H | -6.83206 | 0.83168  | -1.0252  |
| H | -2.01108 | 0.61894  | -2.55219 |
| H | -1.59995 | -1.07333 | 0.72372  |

**L<sup>1</sup>-2OH-<sup>1</sup>RC**

**E : -3431.54938949 a.u.**

|    |          |          |          |
|----|----------|----------|----------|
| O  | -2.57706 | -0.17443 | 1.94392  |
| O  | 8.41542  | -3.47391 | -2.39572 |
| N  | 7.98559  | -3.67566 | -1.25742 |
| C  | 6.72682  | -3.02654 | -0.87524 |
| O  | 8.54192  | -4.38944 | -0.41983 |
| C  | 6.06454  | -2.22469 | -1.80453 |
| C  | 6.21769  | -3.23024 | 0.40962  |
| C  | 4.86332  | -1.61499 | -1.4531  |
| H  | 6.48949  | -2.08713 | -2.79138 |
| C  | 5.0216   | -2.61964 | 0.76111  |
| H  | 6.75869  | -3.85402 | 1.11054  |
| C  | 4.34394  | -1.81787 | -0.16761 |
| H  | 4.3272   | -1.00571 | -2.1695  |
| H  | 4.59844  | -2.74991 | 1.75159  |
| O  | 3.1612   | -1.27085 | 0.28282  |
| P  | 2.17596  | -0.19799 | -0.50315 |
| O  | 1.95395  | -0.62161 | -1.93017 |
| O  | 1.03254  | 0.04157  | 0.44841  |
| O  | 3.13516  | 1.15243  | -0.61998 |
| C  | 3.64082  | 1.91458  | 0.4066   |
| C  | 3.36135  | 1.69115  | 1.76254  |
| C  | 4.47734  | 2.96973  | 0.01404  |
| C  | 3.91523  | 2.53586  | 2.72044  |
| H  | 2.71221  | 0.87728  | 2.05957  |
| C  | 5.02775  | 3.81358  | 0.96923  |
| H  | 4.68919  | 3.10721  | -1.04116 |
| C  | 4.73531  | 3.58956  | 2.31703  |
| H  | 3.71665  | 2.38702  | 3.77492  |
| H  | 5.67689  | 4.63388  | 0.68824  |
| N  | 5.2971   | 4.48765  | 3.33144  |
| O  | 6.01142  | 5.4157   | 2.94616  |
| O  | 5.01818  | 4.26792  | 4.51293  |
| Cu | -2.28199 | 1.66378  | -1.25719 |
| O  | -2.95292 | -0.20509 | -0.88357 |
| N  | -1.10748 | 3.47473  | -1.18024 |
| N  | -2.7713  | 2.23206  | 0.70692  |
| N  | -3.93924 | 3.29108  | -1.7096  |
| N  | -1.04007 | 1.2377   | -2.86894 |
| N  | 0.12923  | -0.44806 | -4.03904 |
| N  | -2.21391 | -0.52773 | -3.81034 |
| C  | -1.06512 | 3.96393  | 0.22353  |
| H  | -1.71329 | 4.83919  | 0.31093  |
| H  | -0.05373 | 4.30194  | 0.48359  |
| C  | -1.51923 | 2.86289  | 1.1863   |
| H  | -0.76048 | 2.07469  | 1.23586  |

|    |          |          |          |
|----|----------|----------|----------|
| H  | -1.63682 | 3.27905  | 2.19795  |
| C  | -3.97348 | 3.08783  | 0.79423  |
| H  | -3.67299 | 4.10005  | 1.08544  |
| H  | -4.63177 | 2.7212   | 1.59089  |
| C  | -4.79062 | 3.13781  | -0.51217 |
| H  | -5.33611 | 2.19697  | -0.62653 |
| H  | -5.53158 | 3.94848  | -0.41889 |
| C  | -3.24889 | 4.59246  | -1.85242 |
| H  | -3.41395 | 5.18608  | -0.94789 |
| H  | -3.67435 | 5.17833  | -2.6765  |
| C  | -1.74192 | 4.42094  | -2.11987 |
| H  | -1.60674 | 4.02226  | -3.12817 |
| H  | -1.24713 | 5.40536  | -2.08504 |
| C  | 0.21473  | 2.97154  | -1.6182  |
| H  | 0.59965  | 2.35541  | -0.8019  |
| H  | 0.91957  | 3.80407  | -1.77283 |
| C  | 0.14041  | 2.12233  | -2.88705 |
| H  | 1.08538  | 1.57883  | -2.95725 |
| C  | -1.00331 | 0.13144  | -3.56107 |
| H  | -2.88775 | 1.31438  | 1.19659  |
| H  | -4.49899 | 3.1035   | -2.53643 |
| H  | -2.1761  | -1.26144 | -4.50992 |
| H  | 0.04206  | -1.2963  | -4.58365 |
| H  | 0.94222  | -0.43865 | -3.40162 |
| H  | -2.98578 | 0.10949  | -3.97909 |
| H  | 0.06984  | 2.75926  | -3.77984 |
| Cu | -2.73121 | -1.59237 | 0.65148  |
| N  | -3.10867 | -3.30581 | 2.14225  |
| N  | -0.58015 | -2.28436 | 1.11013  |
| N  | -2.57271 | -3.20723 | -0.64599 |
| N  | -5.12537 | -1.55719 | 1.29404  |
| N  | -7.44545 | -1.03553 | 1.10271  |
| N  | -5.90022 | -0.22946 | -0.44052 |
| C  | -1.81965 | -3.76305 | 2.70411  |
| H  | -1.56889 | -4.72933 | 2.25531  |
| H  | -1.91781 | -3.94905 | 3.78207  |
| C  | -0.64699 | -2.78036 | 2.48618  |
| H  | -0.77285 | -1.9109  | 3.13739  |
| H  | 0.27795  | -3.29158 | 2.79793  |
| C  | -0.18199 | -3.2512  | 0.07411  |
| H  | -0.14441 | -4.25901 | 0.49992  |
| H  | 0.82564  | -3.03645 | -0.30075 |
| C  | -1.1538  | -3.20027 | -1.11336 |
| H  | -1.00037 | -2.26749 | -1.6614  |
| H  | -0.96565 | -4.03895 | -1.79993 |
| C  | -2.9824  | -4.50943 | -0.02657 |
| H  | -2.0794  | -5.09945 | 0.14375  |
| H  | -3.59875 | -5.08158 | -0.72951 |
| C  | -3.7567  | -4.31038 | 1.27921  |
| H  | -4.75528 | -3.95136 | 1.03434  |
| H  | -3.86579 | -5.28398 | 1.78657  |
| C  | -3.99543 | -2.70612 | 3.16056  |
| H  | -3.44514 | -1.86207 | 3.58393  |

|   |          |          |          |
|---|----------|----------|----------|
| H | -4.21025 | -3.42778 | 3.96614  |
| C | -5.32855 | -2.19701 | 2.58283  |
| H | -5.75046 | -1.50309 | 3.32782  |
| C | -6.12055 | -0.98366 | 0.70715  |
| H | 0.0042   | -1.44254 | 1.03212  |
| H | -3.1794  | -3.01692 | -1.44126 |
| H | -6.56723 | -0.37793 | -1.19084 |
| H | -8.03591 | -0.25355 | 0.84835  |
| H | -7.65286 | -1.42538 | 2.01163  |
| H | -4.91636 | -0.24785 | -0.73321 |
| H | -6.03711 | -3.03891 | 2.50559  |
| H | -1.62025 | -0.05664 | 2.07313  |
| H | -2.78333 | -0.66476 | -1.72797 |

**L<sup>1</sup>-2OH-<sup>1</sup>TS**

**E : -3431.52312259 a.u.**

|    |          |          |          |
|----|----------|----------|----------|
| O  | 1.22623  | 0.61064  | 0.598    |
| O  | 0.98263  | 7.93033  | -1.22629 |
| N  | 0.93908  | 7.50564  | -0.0683  |
| C  | 0.52153  | 6.11709  | 0.13733  |
| O  | 1.23378  | 8.17311  | 0.92699  |
| C  | 0.17845  | 5.33585  | -0.96853 |
| C  | 0.479    | 5.60255  | 1.43595  |
| C  | -0.19626 | 4.00941  | -0.78418 |
| H  | 0.19926  | 5.77511  | -1.95865 |
| C  | 0.11119  | 4.27671  | 1.62029  |
| H  | 0.73485  | 6.23815  | 2.27489  |
| C  | -0.21381 | 3.47345  | 0.51455  |
| H  | -0.48234 | 3.38937  | -1.62371 |
| H  | 0.06356  | 3.84412  | 2.61436  |
| O  | -0.57183 | 2.188    | 0.79685  |
| P  | -0.40722 | 0.85514  | -0.21086 |
| O  | 0.17604  | 1.02266  | -1.60652 |
| O  | -1.06211 | -0.37755 | 0.39422  |
| O  | -2.17195 | 1.50134  | -1.01121 |
| C  | -3.3489  | 1.59688  | -0.44738 |
| C  | -3.59213 | 1.4239   | 0.95074  |
| C  | -4.47356 | 1.87289  | -1.2851  |
| C  | -4.87817 | 1.482    | 1.45774  |
| H  | -2.75416 | 1.24903  | 1.61245  |
| C  | -5.75593 | 1.93207  | -0.77588 |
| H  | -4.28781 | 2.03677  | -2.34226 |
| C  | -5.9599  | 1.72052  | 0.59695  |
| H  | -5.06788 | 1.35062  | 2.51677  |
| H  | -6.60744 | 2.13514  | -1.41459 |
| N  | -7.30867 | 1.74027  | 1.13385  |
| O  | -8.24275 | 1.97519  | 0.35739  |
| O  | -7.45912 | 1.51036  | 2.34187  |
| Cu | -0.64138 | -2.65383 | -0.31315 |
| O  | 1.35225  | -2.26876 | -0.26536 |
| N  | -2.74975 | -3.03431 | -0.38785 |
| N  | -0.93553 | -3.22122 | 1.74275  |
| N  | -0.73547 | -5.1377  | -0.41418 |

|    |          |          |          |
|----|----------|----------|----------|
| N  | -1.08291 | -2.15341 | -2.30092 |
| N  | -0.23109 | -0.62978 | -3.87734 |
| N  | 0.84225  | -2.69856 | -3.46979 |
| C  | -3.29068 | -3.11958 | 0.9999   |
| H  | -3.56598 | -4.15773 | 1.20347  |
| H  | -4.2122  | -2.53208 | 1.08458  |
| C  | -2.26574 | -2.62172 | 2.02349  |
| H  | -2.14545 | -1.5409  | 1.93606  |
| H  | -2.61075 | -2.86366 | 3.03997  |
| C  | -0.83414 | -4.66905 | 2.03566  |
| H  | -1.83669 | -5.05538 | 2.23927  |
| H  | -0.25463 | -4.82896 | 2.9522   |
| C  | -0.18949 | -5.48837 | 0.90246  |
| H  | 0.88585  | -5.28285 | 0.86039  |
| H  | -0.31096 | -6.55609 | 1.15099  |
| C  | -2.15529 | -5.47603 | -0.64425 |
| H  | -2.59268 | -5.85509 | 0.285    |
| H  | -2.25611 | -6.29217 | -1.37095 |
| C  | -2.95646 | -4.27536 | -1.17107 |
| H  | -2.64489 | -4.0587  | -2.19427 |
| H  | -4.02818 | -4.53069 | -1.19349 |
| C  | -3.25132 | -1.83641 | -1.10274 |
| H  | -3.24527 | -1.02203 | -0.38015 |
| H  | -4.29171 | -2.00413 | -1.4197  |
| C  | -2.37142 | -1.43021 | -2.30565 |
| H  | -2.25498 | -0.34462 | -2.25259 |
| C  | -0.1972  | -1.80646 | -3.19715 |
| H  | -0.20771 | -2.7238  | 2.25466  |
| H  | -0.15209 | -5.54396 | -1.13904 |
| H  | 1.37389  | -2.51371 | -4.31337 |
| H  | 0.46219  | -0.4615  | -4.59568 |
| H  | -0.41972 | 0.18664  | -3.27725 |
| H  | 0.55098  | -3.66861 | -3.41594 |
| H  | -2.87276 | -1.66208 | -3.25539 |
| Cu | 2.69369  | -0.60923 | -0.06081 |
| N  | 4.52845  | 0.74117  | 0.72419  |
| N  | 3.00483  | 0.91583  | -1.73002 |
| N  | 4.30448  | -1.48618 | -1.09366 |
| N  | 3.0343   | -0.96651 | 2.4101   |
| N  | 3.33997  | -2.38672 | 4.29859  |
| N  | 2.0636   | -3.07175 | 2.46789  |
| C  | 4.73465  | 1.86404  | -0.21085 |
| H  | 5.60602  | 1.64783  | -0.83701 |
| H  | 4.98315  | 2.78399  | 0.33653  |
| C  | 3.50857  | 2.13679  | -1.1035  |
| H  | 2.6901   | 2.53822  | -0.50229 |
| H  | 3.78646  | 2.90771  | -1.84032 |
| C  | 3.81932  | 0.30835  | -2.77907 |
| H  | 4.7903   | 0.81311  | -2.82469 |
| H  | 3.37311  | 0.43412  | -3.77647 |
| C  | 4.0229   | -1.20203 | -2.5295  |
| H  | 3.10426  | -1.74131 | -2.77575 |
| H  | 4.82773  | -1.58853 | -3.17312 |

|   |         |          |          |
|---|---------|----------|----------|
| C | 5.64988 | -1.00729 | -0.64266 |
| H | 6.05833 | -0.3655  | -1.42653 |
| H | 6.33665 | -1.85707 | -0.55209 |
| C | 5.60224 | -0.25987 | 0.6961   |
| H | 5.41133 | -0.98633 | 1.48725  |
| H | 6.59775 | 0.17985  | 0.886    |
| C | 4.13972 | 1.20993  | 2.06384  |
| H | 3.24602 | 1.82612  | 1.92605  |
| H | 4.92122 | 1.85023  | 2.50842  |
| C | 3.83104 | 0.07239  | 3.0476   |
| H | 3.30938 | 0.52316  | 3.9077   |
| C | 2.83615 | -2.07004 | 3.05188  |
| H | 2.0021  | 1.00126  | -1.94018 |
| H | 4.24475 | -2.49171 | -0.94531 |
| H | 2.3867  | -4.01275 | 2.67198  |
| H | 2.86358 | -3.1054  | 4.8291   |
| H | 3.68984 | -1.63118 | 4.8716   |
| H | 1.91445 | -2.91358 | 1.46143  |
| H | 4.77849 | -0.33412 | 3.4376   |
| H | 1.05801 | 0.29786  | 1.50305  |
| H | 1.61759 | -2.65456 | -1.11982 |

### L<sup>1</sup>-2OH-<sup>1</sup>PC

E : -3431.58215253 a.u.

|   |          |          |          |
|---|----------|----------|----------|
| O | -0.24579 | -2.06296 | -1.69635 |
| O | -7.06168 | -3.9937  | -1.47321 |
| N | -6.91682 | -2.98565 | -2.16824 |
| C | -5.64358 | -2.26314 | -2.06733 |
| O | -7.76331 | -2.55068 | -2.95096 |
| C | -4.66025 | -2.73634 | -1.20021 |
| C | -5.44173 | -1.12246 | -2.84642 |
| C | -3.44113 | -2.06857 | -1.11484 |
| H | -4.8572  | -3.6164  | -0.60032 |
| C | -4.22439 | -0.45837 | -2.76345 |
| H | -6.22986 | -0.77402 | -3.50247 |
| C | -3.2219  | -0.93306 | -1.9068  |
| H | -2.67362 | -2.41738 | -0.43604 |
| H | -4.03121 | 0.4276   | -3.35928 |
| O | -2.0445  | -0.21775 | -1.91827 |
| P | -0.64601 | -0.57571 | -1.09725 |
| O | -0.91381 | -0.76312 | 0.37101  |
| O | 0.33776  | 0.4524   | -1.60608 |
| O | -2.64071 | 2.85381  | 3.17275  |
| C | -3.6957  | 2.28403  | 2.73612  |
| C | -3.65999 | 1.0027   | 2.06675  |
| C | -4.98658 | 2.91679  | 2.88502  |
| C | -4.81055 | 0.42626  | 1.5763   |
| H | -2.70472 | 0.49979  | 1.94535  |
| C | -6.13062 | 2.3336   | 2.39173  |
| H | -5.01841 | 3.87317  | 3.39695  |
| C | -6.04086 | 1.09134  | 1.7328   |
| H | -4.78571 | -0.5279  | 1.06434  |
| H | -7.09978 | 2.80698  | 2.4949   |

|    |          |          |          |
|----|----------|----------|----------|
| N  | -7.24594 | 0.48377  | 1.1935   |
| O  | -8.31094 | 1.10161  | 1.31033  |
| O  | -7.14194 | -0.61941 | 0.64044  |
| Cu | 1.87849  | 1.93972  | -0.50373 |
| O  | 2.86516  | 0.33312  | 0.31769  |
| N  | 0.79299  | 3.668    | -1.32561 |
| N  | 2.82389  | 2.06266  | -2.39674 |
| N  | 3.57113  | 4.01996  | -0.2987  |
| N  | 0.69845  | 2.46499  | 1.0566   |
| N  | 0.03872  | 2.49792  | 3.31856  |
| N  | 2.29091  | 2.20081  | 2.71659  |
| C  | 0.96716  | 3.67186  | -2.80228 |
| H  | 1.5274   | 4.56828  | -3.08355 |
| H  | -0.00583 | 3.74838  | -3.30266 |
| C  | 1.6897   | 2.40767  | -3.29755 |
| H  | 1.00662  | 1.55952  | -3.27336 |
| H  | 2.03702  | 2.56387  | -4.32986 |
| C  | 3.99495  | 2.9631   | -2.54116 |
| H  | 3.69755  | 3.8095   | -3.16661 |
| H  | 4.79517  | 2.45016  | -3.08799 |
| C  | 4.58367  | 3.49032  | -1.22407 |
| H  | 5.09685  | 2.68033  | -0.69329 |
| H  | 5.34998  | 4.23753  | -1.49514 |
| C  | 2.77118  | 5.16415  | -0.78356 |
| H  | 3.05661  | 5.41     | -1.8119  |
| H  | 2.98931  | 6.06584  | -0.19741 |
| C  | 1.25715  | 4.91675  | -0.68396 |
| H  | 0.98257  | 4.8581   | 0.37082  |
| H  | 0.72652  | 5.78234  | -1.11526 |
| C  | -0.57912 | 3.30115  | -0.89406 |
| H  | -0.88868 | 2.46844  | -1.52428 |
| H  | -1.26843 | 4.1426   | -1.06561 |
| C  | -0.63222 | 2.86454  | 0.59172  |
| H  | -1.34268 | 2.03592  | 0.67703  |
| C  | 0.9518   | 2.40731  | 2.33437  |
| H  | 3.11213  | 1.10018  | -2.56685 |
| H  | 4.03995  | 4.27847  | 0.56524  |
| H  | 2.48293  | 2.37012  | 3.69867  |
| H  | 0.3307   | 2.69483  | 4.26632  |
| H  | -0.99114 | 2.53764  | 3.15054  |
| H  | 2.93152  | 2.7161   | 2.11972  |
| H  | -1.018   | 3.67212  | 1.22959  |
| Cu | 2.97692  | -1.74366 | 0.6046   |
| N  | 3.02507  | -3.97617 | 0.8588   |
| N  | 1.18993  | -2.01067 | 1.76452  |
| N  | 3.9013   | -1.97125 | 2.75322  |
| N  | 4.21828  | -2.26171 | -1.01048 |
| N  | 6.07862  | -1.91894 | -2.44058 |
| N  | 4.99207  | -0.11389 | -1.45771 |
| C  | 1.74393  | -4.42008 | 1.46013  |
| H  | 1.9189   | -4.67233 | 2.50882  |
| H  | 1.39007  | -5.34397 | 0.98235  |
| C  | 0.67141  | -3.33432 | 1.34248  |

|                                          |          |          |          |    |          |          |          |
|------------------------------------------|----------|----------|----------|----|----------|----------|----------|
| H                                        | 0.34375  | -3.22718 | 0.3063   | C  | -3.69453 | -0.75127 | -2.79559 |
| H                                        | -0.20981 | -3.62598 | 1.93356  | C  | -5.18858 | -2.01444 | -0.79466 |
| C                                        | 1.43014  | -1.88786 | 3.21909  | H  | -4.16305 | -0.72368 | 0.58759  |
| H                                        | 1.27384  | -2.86345 | 3.69237  | C  | -4.60236 | -1.74232 | -3.14523 |
| H                                        | 0.69204  | -1.21282 | 3.66842  | H  | -3.11474 | -0.23249 | -3.55198 |
| C                                        | 2.8369   | -1.36103 | 3.57379  | C  | -5.33287 | -2.37745 | -2.13594 |
| H                                        | 2.87577  | -0.28361 | 3.38617  | H  | -5.79178 | -2.5063  | -0.04075 |
| H                                        | 2.99844  | -1.51505 | 4.65326  | H  | -4.75546 | -2.02715 | -4.17932 |
| C                                        | 4.17265  | -3.40316 | 3.01082  | N  | -6.26276 | -3.45112 | -2.49182 |
| H                                        | 3.41522  | -3.79105 | 3.69865  | O  | -6.34284 | -3.7737  | -3.68085 |
| H                                        | 5.13574  | -3.53806 | 3.51885  | O  | -6.90227 | -3.98697 | -1.58271 |
| C                                        | 4.19821  | -4.23339 | 1.71456  | Cu | 0.76649  | -2.57549 | 0.85027  |
| H                                        | 5.09257  | -3.96217 | 1.1477   | O  | 2.02851  | -1.64722 | -0.32877 |
| H                                        | 4.28459  | -5.30353 | 1.96966  | N  | -0.49901 | -3.60451 | 2.22525  |
| C                                        | 3.16889  | -4.43606 | -0.53348 | N  | 1.3069   | -1.49113 | 2.58305  |
| H                                        | 2.21423  | -4.23773 | -1.03094 | N  | 2.30668  | -4.09876 | 1.86869  |
| H                                        | 3.3523   | -5.52243 | -0.58492 | N  | -0.47517 | -3.45543 | -0.52833 |
| C                                        | 4.28302  | -3.69749 | -1.28103 | N  | -1.19078 | -4.12802 | -2.67527 |
| H                                        | 4.1553   | -3.91536 | -2.35321 | N  | 0.79867  | -2.94506 | -2.39024 |
| C                                        | 5.06637  | -1.48244 | -1.61788 | C  | -0.54856 | -2.84228 | 3.50978  |
| H                                        | 0.50052  | -1.32071 | 1.43189  | H  | -0.00089 | -3.40948 | 4.26735  |
| H                                        | 4.75535  | -1.43127 | 2.85948  | H  | -1.5829  | -2.77071 | 3.86717  |
| H                                        | 5.89128  | 0.3552   | -1.42941 | C  | 0.04491  | -1.43336 | 3.35673  |
| H                                        | 6.44887  | -1.2698  | -3.12256 | H  | -0.63945 | -0.80265 | 2.78718  |
| H                                        | 6.08718  | -2.8835  | -2.73902 | H  | 0.19621  | -0.99032 | 4.35235  |
| H                                        | 4.34078  | 0.1717   | -0.70531 | C  | 2.45745  | -2.07323 | 3.31312  |
| H                                        | 5.26316  | -4.10507 | -0.98804 | H  | 2.09277  | -2.51006 | 4.24816  |
| H                                        | -0.00974 | -2.00385 | -2.63701 | H  | 3.16186  | -1.28417 | 3.60426  |
| H                                        | 2.86252  | 0.62161  | 1.24847  | C  | 3.21968  | -3.13932 | 2.50361  |
| <b>L<sup>1</sup>-2OH-<sup>os</sup>RC</b> |          |          |          | H  | 3.77002  | -2.65335 | 1.69243  |
| <b>E : -3431.61156460 a.u.</b>           |          |          |          | H  | 3.95187  | -3.6197  | 3.17429  |
| O                                        | 2.75358  | 0.66588  | 1.15045  | C  | 1.53877  | -4.98436 | 2.7595   |
| O                                        | -5.22079 | 7.18162  | 0.44132  | H  | 1.68549  | -4.66731 | 3.79668  |
| N                                        | -5.24537 | 6.47579  | 1.45357  | H  | 1.89583  | -6.02114 | 2.70951  |
| C                                        | -4.63149 | 5.14743  | 1.37798  | C  | 0.04417  | -4.97486 | 2.39413  |
| O                                        | -5.74974 | 6.81817  | 2.52591  | H  | -0.08088 | -5.49357 | 1.4411   |
| C                                        | -4.06145 | 4.72843  | 0.17505  | H  | -0.53233 | -5.52942 | 3.1513   |
| C                                        | -4.62685 | 4.33113  | 2.51197  | C  | -1.80684 | -3.59511 | 1.52021  |
| C                                        | -3.46629 | 3.47351  | 0.0998   | H  | -2.15204 | -2.55964 | 1.52429  |
| H                                        | -4.09119 | 5.38403  | -0.68671 | H  | -2.53826 | -4.22537 | 2.04891  |
| C                                        | -4.03123 | 3.07948  | 2.43504  | C  | -1.66863 | -4.05342 | 0.0636   |
| H                                        | -5.08029 | 4.68323  | 3.43042  | H  | -2.59048 | -3.73008 | -0.44324 |
| C                                        | -3.44793 | 2.65029  | 1.23454  | C  | -0.31788 | -3.48666 | -1.82935 |
| H                                        | -3.0184  | 3.13691  | -0.82644 | H  | 1.55859  | -0.56104 | 2.22301  |
| H                                        | -4.00616 | 2.4194   | 3.29564  | H  | 2.78953  | -4.62482 | 1.14717  |
| O                                        | -2.90752 | 1.38773  | 1.25078  | H  | 0.78978  | -2.75475 | -3.38235 |
| P                                        | -1.74048 | 0.79322  | 0.22192  | H  | -1.13249 | -3.94618 | -3.66777 |
| O                                        | -0.74359 | 1.86369  | -0.10576 | H  | -2.12146 | -4.34184 | -2.34757 |
| O                                        | -1.38155 | -0.54962 | 0.78291  | H  | 1.32952  | -2.29646 | -1.77841 |
| O                                        | -2.60825 | 0.59117  | -1.20197 | H  | -1.63443 | -5.15206 | -0.00571 |
| C                                        | -3.51671 | -0.39579 | -1.44824 | Cu | 3.38179  | 1.39372  | -0.53518 |
| C                                        | -4.27883 | -1.02097 | -0.4473  | N  | 4.68705  | 3.24484  | -0.67396 |
|                                          |          |          |          | N  | 1.86042  | 2.7743   | -0.48697 |

|                                          |          |          |          |    |          |          |          |
|------------------------------------------|----------|----------|----------|----|----------|----------|----------|
| N                                        | 3.25949  | 1.82463  | -2.69507 | H  | -1.70931 | 3.14083  | -2.76327 |
| N                                        | 5.24553  | 0.51748  | -0.35824 | O  | -0.11083 | 2.09491  | -1.05547 |
| N                                        | 6.93212  | -1.0822  | -0.77621 | P  | 0.04575  | 0.75528  | -0.09417 |
| N                                        | 4.69824  | -1.63077 | -1.07211 | O  | -0.59862 | 0.81726  | 1.2714   |
| C                                        | 3.79324  | 4.36487  | -0.30593 | O  | 1.06831  | -0.18334 | -0.6696  |
| H                                        | 3.60195  | 4.95684  | -1.20612 | O  | 1.68347  | 1.95795  | 0.9393   |
| H                                        | 4.28212  | 5.0456   | 0.40484  | C  | 2.7422   | 2.52922  | 0.41018  |
| C                                        | 2.45652  | 3.88108  | 0.29859  | C  | 3.02424  | 2.50686  | -0.98816 |
| H                                        | 2.61294  | 3.48623  | 1.30655  | C  | 3.68272  | 3.1952   | 1.25146  |
| H                                        | 1.76546  | 4.73254  | 0.37586  | C  | 4.17556  | 3.08433  | -1.49686 |
| C                                        | 1.34783  | 3.1341   | -1.83321 | H  | 2.31791  | 2.02917  | -1.65577 |
| H                                        | 1.70185  | 4.13263  | -2.10624 | C  | 4.83409  | 3.7702   | 0.74404  |
| H                                        | 0.25572  | 3.16243  | -1.8028  | H  | 3.46861  | 3.25327  | 2.3157   |
| C                                        | 1.80431  | 2.09322  | -2.8592  | C  | 5.08905  | 3.7054   | -0.6337  |
| H                                        | 1.27656  | 1.15167  | -2.67662 | H  | 4.38614  | 3.06497  | -2.56009 |
| H                                        | 1.56244  | 2.43053  | -3.87761 | H  | 5.54376  | 4.27117  | 1.39216  |
| C                                        | 4.12711  | 2.96529  | -3.094   | N  | 6.30625  | 4.27593  | -1.16823 |
| H                                        | 3.49261  | 3.83974  | -3.25786 | O  | 7.09232  | 4.8266   | -0.38424 |
| H                                        | 4.61857  | 2.76145  | -4.05244 | O  | 6.51414  | 4.18058  | -2.38762 |
| C                                        | 5.21025  | 3.28856  | -2.04441 | Cu | 1.92869  | -2.51597 | 0.4676   |
| H                                        | 6.0016   | 2.54211  | -2.12711 | O  | 0.06038  | -2.98478 | 0.819    |
| H                                        | 5.6629   | 4.26374  | -2.2882  | N  | 3.9476   | -2.15355 | -0.09433 |
| C                                        | 5.66403  | 2.86     | 0.35617  | N  | 1.81764  | -3.17027 | -1.57155 |
| H                                        | 5.12808  | 2.83706  | 1.31098  | N  | 2.86048  | -4.70645 | 0.62629  |
| H                                        | 6.48387  | 3.59143  | 0.45484  | N  | 2.45115  | -1.30183 | 2.08406  |
| C                                        | 6.27092  | 1.46912  | 0.08207  | N  | 1.62153  | 0.51815  | 3.33882  |
| H                                        | 6.76151  | 1.13772  | 1.01074  | N  | 0.61042  | -1.60506 | 3.46015  |
| C                                        | 5.61189  | -0.69932 | -0.70233 | C  | 4.10545  | -2.25414 | -1.57408 |
| H                                        | 1.07738  | 2.34866  | 0.02943  | H  | 4.65333  | -3.17099 | -1.80712 |
| H                                        | 3.51359  | 0.99364  | -3.22487 | H  | 4.71787  | -1.42486 | -1.94722 |
| H                                        | 5.03146  | -2.53118 | -1.3881  | C  | 2.7429   | -2.24965 | -2.27442 |
| H                                        | 7.16498  | -2.06545 | -0.76315 | H  | 2.29414  | -1.25609 | -2.21681 |
| H                                        | 7.65143  | -0.47295 | -0.41804 | H  | 2.8702   | -2.52175 | -3.33296 |
| H                                        | 3.6919   | -1.60008 | -0.77428 | C  | 2.10047  | -4.61287 | -1.74483 |
| H                                        | 7.06569  | 1.57024  | -0.6734  | H  | 3.07423  | -4.72048 | -2.23152 |
| H                                        | 3.56074  | 0.27759  | 1.52431  | H  | 1.3747   | -5.07215 | -2.42854 |
| H                                        | 2.06818  | -0.75916 | 0.08853  | C  | 2.09207  | -5.39549 | -0.41663 |
| <b>L<sup>1</sup>-2OH-<sup>0s</sup>TS</b> |          |          |          | H  | 1.06723  | -5.47033 | -0.0381  |
| <b>E: -3431.59981104 a.u.</b>            |          |          |          | H  | 2.45429  | -6.41683 | -0.62104 |
| O                                        | -1.44907 | -0.00636 | -0.91062 | C  | 4.31638  | -4.58778 | 0.4264   |
| O                                        | -3.50642 | 6.93471  | 1.06912  | H  | 4.57331  | -4.94016 | -0.5774  |
| N                                        | -3.50649 | 6.43396  | -0.05796 | H  | 4.87244  | -5.23108 | 1.11997  |
| C                                        | -2.5869  | 5.32014  | -0.31362 | C  | 4.78675  | -3.13713 | 0.63459  |
| O                                        | -4.24141 | 6.79787  | -0.97995 | H  | 4.71647  | -2.89905 | 1.69754  |
| C                                        | -1.74349 | 4.88216  | 0.7109   | H  | 5.84332  | -3.03794 | 0.34101  |
| C                                        | -2.5845  | 4.71776  | -1.57407 | C  | 4.1512   | -0.75514 | 0.37307  |
| C                                        | -0.89979 | 3.79878  | 0.48619  | H  | 3.54336  | -0.11656 | -0.27045 |
| H                                        | -1.74894 | 5.39729  | 1.66406  | H  | 5.20584  | -0.46207 | 0.26167  |
| C                                        | -1.74618 | 3.63073  | -1.7957  | C  | 3.70379  | -0.57209 | 1.8187   |
| H                                        | -3.23168 | 5.10011  | -2.35407 | H  | 3.63394  | 0.50141  | 1.99575  |
| C                                        | -0.92043 | 3.16171  | -0.76381 | C  | 1.60136  | -0.77985 | 2.93604  |
| H                                        | -0.21576 | 3.44256  | 1.24702  | H  | 0.8533   | -2.95937 | -1.82029 |
|                                          |          |          |          | H  | 2.6406   | -5.09856 | 1.53647  |

|                                          |          |          |          |    |           |          |          |
|------------------------------------------|----------|----------|----------|----|-----------|----------|----------|
| H                                        | 0.13096  | -1.24577 | 4.27688  | C  | -1.62189  | 0.69293  | -2.61476 |
| H                                        | 0.85344  | 0.80321  | 3.93431  | C  | -2.62544  | 2.91837  | -2.58749 |
| H                                        | 1.75284  | 1.19232  | 2.55267  | C  | -0.36361  | 1.25611  | -2.77112 |
| H                                        | 0.89723  | -2.5714  | 3.56922  | H  | -1.7408   | -0.38143 | -2.56163 |
| H                                        | 4.46698  | -0.95193 | 2.51322  | C  | -1.36646  | 3.47942  | -2.7461  |
| Cu                                       | -2.95935 | -1.05201 | -0.09441 | H  | -3.51185  | 3.53877  | -2.52392 |
| N                                        | -5.12944 | -0.7702  | -0.47249 | C  | -0.22644  | 2.65536  | -2.8184  |
| N                                        | -3.26616 | 0.44141  | 1.2597   | H  | 0.51949   | 0.63381  | -2.85717 |
| N                                        | -3.78314 | -2.27939 | 1.56293  | H  | -1.23935  | 4.55445  | -2.82354 |
| N                                        | -3.14941 | -2.26013 | -1.71967 | O  | 0.97098   | 3.27495  | -2.96561 |
| N                                        | -2.8646  | -4.2029  | -3.027   | P  | 2.41004   | 2.69016  | -2.29781 |
| N                                        | -1.35196 | -3.71472 | -1.34726 | O  | 2.79526   | 1.39651  | -2.95485 |
| C                                        | -5.50925 | 0.50682  | 0.18234  | O  | 2.25043   | 2.7562   | -0.78921 |
| H                                        | -6.12151 | 0.27224  | 1.05805  | O  | -5.5382   | -1.93312 | 1.13159  |
| H                                        | -6.14099 | 1.11618  | -0.47715 | C  | -6.69477  | -1.9518  | 0.62815  |
| C                                        | -4.26687 | 1.3147   | 0.60554  | C  | -6.95843  | -1.36203 | -0.6764  |
| H                                        | -3.7756  | 1.75372  | -0.26834 | C  | -7.80616  | -2.56229 | 1.34081  |
| H                                        | -4.56623 | 2.14487  | 1.2603   | C  | -8.2259   | -1.39041 | -1.21231 |
| C                                        | -3.60295 | -0.04786 | 2.61653  | H  | -6.12699  | -0.90254 | -1.20359 |
| H                                        | -4.66259 | 0.13672  | 2.81468  | C  | -9.06461  | -2.58508 | 0.79064  |
| H                                        | -3.03927 | 0.51643  | 3.36793  | H  | -7.60082  | -2.99804 | 2.3129   |
| C                                        | -3.27849 | -1.54128 | 2.74943  | C  | -9.26164  | -1.99969 | -0.47796 |
| H                                        | -2.19343 | -1.67972 | 2.77642  | H  | -8.44523  | -0.95587 | -2.18005 |
| H                                        | -3.69904 | -1.93371 | 3.68714  | H  | -9.90617  | -3.03737 | 1.30115  |
| C                                        | -5.26473 | -2.34794 | 1.47032  | N  | -10.61616 | -2.02837 | -1.06002 |
| H                                        | -5.69091 | -1.6864  | 2.2292   | O  | -11.5041  | -2.57332 | -0.40283 |
| H                                        | -5.6219  | -3.35611 | 1.7095   | O  | -10.77126 | -1.50569 | -2.16357 |
| C                                        | -5.79805 | -1.96248 | 0.07299  | Cu | -0.09748  | 1.08218  | 1.63099  |
| H                                        | -5.61429 | -2.79425 | -0.60894 | O  | 1.30617   | 0.18781  | 0.64698  |
| H                                        | -6.88951 | -1.82862 | 0.13259  | N  | -1.58819  | 2.08557  | 2.79957  |
| C                                        | -5.07664 | -0.70785 | -1.94607 | N  | 0.68214   | 3.0476   | 1.4644   |
| H                                        | -4.55446 | 0.21804  | -2.20827 | N  | 1.00985   | 1.23163  | 3.6596   |
| H                                        | -6.08139 | -0.65758 | -2.39552 | N  | -1.64804  | -0.22899 | 1.25503  |
| C                                        | -4.32007 | -1.9118  | -2.53782 | N  | -2.61345  | -2.27997 | 0.55864  |
| H                                        | -4.0307  | -1.64726 | -3.56613 | N  | -0.49849  | -1.65185 | -0.16528 |
| C                                        | -2.47529 | -3.34817 | -2.01966 | C  | -1.41051  | 3.56076  | 2.66385  |
| H                                        | -2.3128  | 0.85995  | 1.27378  | H  | -0.95969  | 3.9455   | 3.58199  |
| H                                        | -3.3821  | -3.2146  | 1.55244  | H  | -2.38495  | 4.05607  | 2.56855  |
| H                                        | -1.13156 | -4.70322 | -1.36997 | C  | -0.52177  | 3.89927  | 1.4616   |
| H                                        | -2.16995 | -4.82939 | -3.41171 | H  | -1.05408  | 3.70499  | 0.52424  |
| H                                        | -3.54963 | -3.89218 | -3.70012 | H  | -0.27419  | 4.97163  | 1.48021  |
| H                                        | -0.98101 | -3.24308 | -0.47422 | C  | 1.66822   | 3.36215  | 2.52424  |
| H                                        | -5.00845 | -2.76673 | -2.61026 | H  | 1.2336    | 4.09352  | 3.21487  |
| H                                        | -1.15816 | -0.40102 | -1.74823 | H  | 2.54795   | 3.8394   | 2.07776  |
| H                                        | -0.21538 | -2.36427 | 1.51339  | C  | 2.13246   | 2.11334  | 3.29643  |
| <b>L<sup>1</sup>-2OH-<sup>os</sup>PC</b> |          |          |          | H  | 2.79523   | 1.51997  | 2.66124  |
| <b>E : -3431.62280513 a.u.</b>           |          |          |          | H  | 2.70911   | 2.44286  | 4.17563  |
| O                                        | 3.39199  | 3.87081  | -2.82856 | C  | 0.06461   | 1.73641  | 4.66942  |
| O                                        | -4.13636 | -0.30898 | -2.27772 | H  | 0.30171   | 2.78084  | 4.89623  |
| N                                        | -4.04701 | 0.92993  | -2.2812  | H  | 0.15872   | 1.19488  | 5.61966  |
| C                                        | -2.74201 | 1.52459  | -2.50721 | C  | -1.39567  | 1.6048   | 4.19146  |
| O                                        | -5.01173 | 1.67717  | -2.07897 | H  | -1.67821  | 0.54901  | 4.20997  |
|                                          |          |          |          | H  | -2.06706  | 2.13747  | 4.88331  |

|    |          |          |          |
|----|----------|----------|----------|
| C  | -2.87693 | 1.63953  | 2.21155  |
| H  | -2.99358 | 2.17539  | 1.264    |
| H  | -3.71918 | 1.91889  | 2.86302  |
| C  | -2.89039 | 0.13789  | 1.93007  |
| H  | -3.77857 | -0.066   | 1.31758  |
| C  | -1.60248 | -1.3558  | 0.57055  |
| H  | 1.15489  | 3.07611  | 0.54665  |
| H  | 1.37347  | 0.30872  | 3.88579  |
| H  | -0.3217  | -2.6219  | -0.38814 |
| H  | -2.65387 | -2.88999 | -0.24861 |
| H  | -3.53831 | -2.0234  | 0.89428  |
| H  | 0.31758  | -1.01705 | -0.03879 |
| H  | -3.02242 | -0.43367 | 2.86174  |
| Cu | 4.40301  | -1.62006 | -0.24941 |
| N  | 6.65685  | -1.8991  | -0.39003 |
| N  | 4.68104  | -0.48715 | -1.99246 |
| N  | 4.5187   | -3.34503 | -1.73541 |
| N  | 4.66884  | -1.76576 | 1.74851  |
| N  | 4.02723  | -2.69159 | 3.83488  |
| N  | 2.49474  | -1.49253 | 2.5879   |
| C  | 7.09962  | -0.95387 | -1.431   |
| H  | 7.35814  | -1.52589 | -2.3267  |
| H  | 8.02195  | -0.43356 | -1.13318 |
| C  | 6.02724  | 0.10025  | -1.78635 |
| H  | 5.93237  | 0.82413  | -0.96997 |
| H  | 6.3664   | 0.65544  | -2.67438 |
| C  | 4.56571  | -1.3242  | -3.21326 |
| H  | 5.55466  | -1.45701 | -3.66501 |
| H  | 3.95274  | -0.80147 | -3.95535 |
| C  | 3.93075  | -2.69558 | -2.92996 |
| H  | 2.86327  | -2.56227 | -2.72323 |
| H  | 4.01951  | -3.3209  | -3.83303 |
| C  | 5.93056  | -3.77636 | -1.88628 |
| H  | 6.31681  | -3.38628 | -2.83219 |
| H  | 6.00063  | -4.86897 | -1.96153 |
| C  | 6.83148  | -3.31676 | -0.72048 |
| H  | 6.56902  | -3.90087 | 0.16686  |
| H  | 7.88038  | -3.56458 | -0.96548 |
| C  | 7.02515  | -1.52442 | 0.97835  |
| H  | 6.98736  | -0.43191 | 1.03731  |
| H  | 8.05498  | -1.8316  | 1.23478  |
| C  | 6.06974  | -2.09545 | 2.04082  |
| H  | 6.3832   | -1.67482 | 3.00877  |
| C  | 3.78188  | -1.98176 | 2.6801   |
| H  | 4.01334  | 0.2861   | -2.11588 |
| H  | 3.94396  | -4.1417  | -1.47523 |
| H  | 1.7675   | -2.15979 | 2.82544  |
| H  | 3.47088  | -2.48416 | 4.65285  |
| H  | 4.95611  | -3.03773 | 4.02253  |
| H  | 2.25841  | -0.92825 | 1.75025  |
| H  | 6.20498  | -3.18672 | 2.10656  |
| H  | 3.31902  | 4.67157  | -2.28367 |
| H  | 1.74308  | 0.8487   | 0.07476  |

### L<sup>1</sup>-OH-<sup>3</sup>RC

E : -3355.62238768 a.u.

|    |          |          |          |
|----|----------|----------|----------|
| O  | 3.58333  | -0.86241 | -2.15049 |
| O  | 4.95693  | -1.52614 | 3.51165  |
| N  | 4.53019  | -2.386   | 2.73581  |
| C  | 3.15492  | -2.23148 | 2.24273  |
| O  | 5.18683  | -3.34301 | 2.3273   |
| C  | 2.29906  | -1.34509 | 2.89914  |
| C  | 2.76784  | -2.9383  | 1.10491  |
| C  | 1.01991  | -1.14314 | 2.38664  |
| H  | 2.63344  | -0.83205 | 3.79317  |
| C  | 1.49512  | -2.71741 | 0.58468  |
| H  | 3.46561  | -3.60663 | 0.61582  |
| C  | 0.64426  | -1.81421 | 1.22022  |
| H  | 0.32501  | -0.46796 | 2.87347  |
| H  | 1.17128  | -3.2202  | -0.3204  |
| O  | -0.62786 | -1.6183  | 0.6695   |
| P  | -1.03178 | -0.20066 | -0.06636 |
| O  | 0.13012  | 0.47785  | -0.7076  |
| O  | -2.25927 | -0.55349 | -0.92049 |
| O  | -1.56942 | 0.58331  | 1.28603  |
| C  | -2.12738 | 1.8494   | 1.30482  |
| C  | -2.89148 | 2.16214  | 2.4353   |
| C  | -1.93808 | 2.78646  | 0.28179  |
| C  | -3.49802 | 3.40987  | 2.53642  |
| H  | -2.99456 | 1.4276   | 3.22758  |
| C  | -2.55114 | 4.03383  | 0.37964  |
| H  | -1.30702 | 2.55144  | -0.56774 |
| C  | -3.33148 | 4.3264   | 1.49694  |
| H  | -4.09308 | 3.67876  | 3.40111  |
| H  | -2.42368 | 4.78253  | -0.39325 |
| N  | -4.00385 | 5.63407  | 1.5766   |
| O  | -3.86712 | 6.4015   | 0.6227   |
| O  | -4.67047 | 5.87046  | 2.58265  |
| Cu | -4.09717 | -1.28553 | -0.50833 |
| N  | -5.95742 | -2.00183 | 0.16243  |
| N  | -3.35131 | -2.88776 | 0.60578  |
| N  | -4.39498 | -2.94193 | -2.05785 |
| N  | -5.17294 | 0.38109  | -0.92303 |
| N  | -5.78443 | 2.28352  | -2.16827 |
| N  | -3.76579 | 1.2189   | -2.56989 |
| C  | -5.74127 | -3.03734 | 1.21995  |
| H  | -5.9604  | -4.01766 | 0.79223  |
| H  | -6.44939 | -2.89485 | 2.04438  |
| C  | -4.30103 | -2.99502 | 1.74442  |
| H  | -4.14686 | -2.11328 | 2.3756   |
| H  | -4.10134 | -3.88102 | 2.36203  |
| C  | -3.20541 | -4.12594 | -0.21682 |
| H  | -3.98967 | -4.82995 | 0.07424  |
| H  | -2.2532  | -4.61454 | 0.01413  |
| C  | -3.27064 | -3.84263 | -1.72595 |
| H  | -2.35585 | -3.33535 | -2.04697 |
| H  | -3.32726 | -4.80406 | -2.25721 |



|    |          |          |          |                                        |          |          |          |
|----|----------|----------|----------|----------------------------------------|----------|----------|----------|
| C  | -5.75289 | -3.49973 | -1.85479 | H                                      | 7.30918  | -3.80879 | -0.29055 |
| H  | -5.67546 | -4.47043 | -1.35655 | H                                      | 7.85498  | -2.45386 | 0.55303  |
| H  | -6.24923 | -3.69426 | -2.81207 | H                                      | 4.54848  | -2.20715 | -1.80312 |
| C  | -6.64507 | -2.54002 | -1.04479 | H                                      | 7.78442  | -0.05943 | 0.28271  |
| H  | -6.91101 | -1.69018 | -1.67559 | H                                      | 2.64339  | -0.90269 | -1.91465 |
| H  | -7.57875 | -3.04476 | -0.75807 |                                        |          |          |          |
| C  | -6.59536 | -0.77088 | 0.70508  | <b>L<sup>1</sup>-OH-<sup>3</sup>TS</b> |          |          |          |
| H  | -6.06159 | -0.51939 | 1.62712  | <b>E : -3355.60170457 a.u.</b>         |          |          |          |
| H  | -7.64564 | -0.9597  | 0.96791  | O                                      | 1.67039  | -1.24889 | 0.06904  |
| C  | -6.49094 | 0.3946   | -0.28387 | O                                      | 2.97622  | 5.38219  | 3.15639  |
| H  | -6.66331 | 1.32104  | 0.28378  | N                                      | 3.06716  | 4.29166  | 3.71841  |
| C  | -4.91645 | 1.28912  | -1.84972 | C                                      | 2.27845  | 3.17485  | 3.16596  |
| H  | -2.42926 | -2.60412 | 0.94215  | O                                      | 3.77708  | 4.05537  | 4.69528  |
| H  | -4.28631 | -2.61109 | -3.01346 | C                                      | 1.4515   | 3.40558  | 2.06658  |
| H  | -3.47656 | 2.02016  | -3.11406 | C                                      | 2.38762  | 1.91338  | 3.75221  |
| H  | -5.56678 | 2.96717  | -2.87964 | C                                      | 0.72896  | 2.3456   | 1.51984  |
| H  | -6.65176 | 2.41475  | -1.67201 | H                                      | 1.37185  | 4.40568  | 1.65641  |
| H  | -3.01744 | 0.64557  | -2.17944 | C                                      | 1.67083  | 0.85426  | 3.20208  |
| H  | -7.29355 | 0.32336  | -1.03339 | H                                      | 3.02337  | 1.77579  | 4.61883  |
| Cu | 4.526    | 0.37702  | -1.02838 | C                                      | 0.85257  | 1.06836  | 2.08465  |
| N  | 5.57892  | 1.83035  | 0.11532  | H                                      | 0.06914  | 2.5101   | 0.67697  |
| N  | 2.89652  | 1.77397  | -0.78899 | H                                      | 1.72799  | -0.13828 | 3.6387   |
| N  | 5.07718  | 1.83357  | -2.68234 | O                                      | 0.14784  | -0.02448 | 1.6187   |
| N  | 5.89159  | -0.91262 | -0.17169 | P                                      | -0.0427  | -0.40741 | -0.00884 |
| N  | 7.32133  | -2.79791 | -0.2328  | O                                      | 0.41762  | 0.55422  | -1.06622 |
| N  | 5.30463  | -2.7976  | -1.39068 | O                                      | -0.80734 | -1.73148 | -0.07579 |
| C  | 4.6275   | 2.86605  | 0.61446  | O                                      | -1.87177 | 0.51248  | 0.19387  |
| H  | 4.7541   | 3.7718   | 0.01822  | C                                      | -2.29924 | 1.56881  | -0.53385 |
| H  | 4.87048  | 3.14391  | 1.64735  | C                                      | -2.82005 | 2.69688  | 0.13435  |
| C  | 3.17288  | 2.38488  | 0.53071  | C                                      | -2.26968 | 1.57099  | -1.9444  |
| H  | 2.98399  | 1.61374  | 1.28544  | C                                      | -3.31447 | 3.78721  | -0.57625 |
| H  | 2.50136  | 3.22921  | 0.74835  | H                                      | -2.81719 | 2.71269  | 1.22074  |
| C  | 2.86673  | 2.72721  | -1.93112 | C                                      | -2.75731 | 2.65651  | -2.66067 |
| H  | 3.18433  | 3.71337  | -1.57727 | H                                      | -1.84494 | 0.72135  | -2.46463 |
| H  | 1.8379   | 2.8459   | -2.289   | C                                      | -3.28139 | 3.7533   | -1.97061 |
| C  | 3.74209  | 2.27937  | -3.11769 | H                                      | -3.7149  | 4.65766  | -0.0698  |
| H  | 3.27921  | 1.41702  | -3.60502 | H                                      | -2.73986 | 2.67069  | -3.74412 |
| H  | 3.78781  | 3.10568  | -3.84374 | N                                      | -3.80276 | 4.89509  | -2.73148 |
| C  | 5.98996  | 2.85934  | -2.14064 | O                                      | -3.75026 | 4.83342  | -3.96211 |
| H  | 5.4415   | 3.79754  | -2.01199 | O                                      | -4.26337 | 5.84452  | -2.09644 |
| H  | 6.80739  | 3.08186  | -2.83684 | Cu                                     | -3.01796 | -1.31581 | 0.48315  |
| C  | 6.60265  | 2.39648  | -0.80573 | N                                      | -5.11646 | -1.30506 | 1.16717  |
| H  | 7.32921  | 1.60602  | -1.00792 | N                                      | -2.64637 | -0.99934 | 2.48131  |
| H  | 7.14202  | 3.22591  | -0.32391 | N                                      | -3.24711 | -3.47625 | 1.26796  |
| C  | 6.17881  | 1.05713  | 1.23548  | N                                      | -3.93864 | -1.33089 | -1.3101  |
| H  | 5.36829  | 0.82027  | 1.93127  | N                                      | -4.15849 | -1.73912 | -3.62165 |
| H  | 6.91857  | 1.66488  | 1.77664  | N                                      | -2.2511  | -2.41344 | -2.48517 |
| C  | 6.80834  | -0.25137 | 0.75492  | C                                      | -5.12664 | -0.76795 | 2.552    |
| H  | 6.999    | -0.85636 | 1.65409  | H                                      | -5.35336 | -1.58755 | 3.23893  |
| C  | 6.1718   | -2.13615 | -0.58105 | H                                      | -5.92743 | -0.02899 | 2.68288  |
| H  | 2.00686  | 1.27169  | -0.74573 | C                                      | -3.77497 | -0.13081 | 2.91188  |
| H  | 5.51616  | 1.30281  | -3.42978 | H                                      | -3.65128 | 0.81776  | 2.383    |
| H  | 5.6818   | -3.5359  | -1.97149 | H                                      | -3.73352 | 0.07863  | 3.98959  |



|    |          |          |          |
|----|----------|----------|----------|
| C  | -6.28215 | 3.06407  | -1.06246 |
| H  | -5.48019 | 3.68119  | -1.46988 |
| H  | -7.09907 | 3.75087  | -0.81224 |
| C  | -6.74893 | 2.05369  | -2.11706 |
| H  | -7.65996 | 1.54623  | -1.78182 |
| H  | -6.99516 | 2.59686  | -3.0415  |
| C  | -4.46717 | 1.47738  | -2.97411 |
| H  | -4.5072  | 2.56549  | -3.08531 |
| H  | -4.39274 | 1.07364  | -3.98977 |
| C  | -3.20615 | 1.06591  | -2.19148 |
| H  | -3.02198 | -0.003   | -2.32594 |
| H  | -2.33768 | 1.60528  | -2.5942  |
| C  | -3.3479  | 2.70799  | -0.30094 |
| H  | -3.41405 | 3.3568   | -1.1791  |
| H  | -2.40148 | 2.94623  | 0.19559  |
| C  | -4.50466 | 2.98485  | 0.66981  |
| H  | -4.28342 | 2.52572  | 1.63798  |
| H  | -4.62125 | 4.06595  | 0.83579  |
| C  | -6.8402  | 2.34285  | 1.22305  |
| H  | -7.79627 | 2.22173  | 0.70631  |
| H  | -6.87265 | 3.29064  | 1.77868  |
| C  | -6.65998 | 1.15359  | 2.16777  |
| H  | -7.56155 | 1.11695  | 2.79426  |
| C  | -6.9934  | -1.20262 | 1.71839  |
| H  | -6.10808 | 0.22218  | -2.81691 |
| H  | -2.52881 | 0.83687  | -0.2858  |
| H  | -7.0204  | -3.19333 | 1.26066  |
| H  | -8.26378 | -2.20629 | 2.98964  |
| H  | -7.78144 | -0.67386 | 3.55993  |
| H  | -6.28108 | -2.17301 | 0.09107  |
| H  | -5.80801 | 1.30894  | 2.84509  |
| Cu | 3.50623  | -1.06815 | -0.20226 |
| N  | 5.48727  | -1.46643 | -0.80025 |
| N  | 3.31633  | -0.33974 | -2.11104 |
| N  | 3.10669  | -3.04293 | -1.23746 |
| N  | 4.30075  | -1.28287 | 1.67095  |
| N  | 4.27994  | -1.34428 | 4.02569  |
| N  | 2.30606  | -1.64515 | 2.81505  |
| C  | 5.73574  | -0.81376 | -2.1242  |
| H  | 5.73866  | -1.5883  | -2.89361 |
| H  | 6.73054  | -0.35361 | -2.14163 |
| C  | 4.65174  | 0.23001  | -2.41623 |
| H  | 4.78151  | 1.11332  | -1.78219 |
| H  | 4.7195   | 0.56422  | -3.46045 |
| C  | 2.83997  | -1.373   | -3.07429 |
| H  | 3.67373  | -1.66301 | -3.71962 |
| H  | 2.07563  | -0.93435 | -3.72405 |
| C  | 2.25478  | -2.60102 | -2.36591 |
| H  | 1.27757  | -2.35345 | -1.94319 |
| H  | 2.10127  | -3.39916 | -3.10676 |
| C  | 4.42488  | -3.59976 | -1.62504 |
| H  | 4.57466  | -3.47081 | -2.70135 |
| H  | 4.46182  | -4.67954 | -1.44246 |

|   |         |          |          |
|---|---------|----------|----------|
| C | 5.58164 | -2.95119 | -0.83851 |
| H | 5.54759 | -3.30549 | 0.19384  |
| H | 6.54659 | -3.2604  | -1.26543 |
| C | 6.28999 | -0.84476 | 0.2831   |
| H | 6.21516 | 0.23867  | 0.14829  |
| H | 7.35079 | -1.11757 | 0.18978  |
| C | 5.76924 | -1.22048 | 1.67584  |
| H | 6.14811 | -0.45093 | 2.36347  |
| C | 3.67773 | -1.43324 | 2.81463  |
| H | 2.59146 | 0.39682  | -2.03396 |
| H | 2.5712  | -3.72922 | -0.70339 |
| H | 1.86991 | -1.68306 | 3.73086  |
| H | 3.80766 | -1.63164 | 4.87152  |
| H | 5.24548 | -1.06782 | 4.12496  |
| H | 1.96896 | -2.42099 | 2.23525  |
| H | 6.18623 | -2.18169 | 2.0065   |
| H | 1.56984 | -0.45787 | 1.39162  |

### L<sup>1</sup>-OH-<sup>1</sup>TS

E : -3355.53791901 a.u.

|    |          |          |          |
|----|----------|----------|----------|
| O  | 1.50673  | -1.29137 | -0.03834 |
| O  | 2.89574  | 5.53856  | 3.0613   |
| N  | 2.99442  | 4.46205  | 3.64845  |
| C  | 2.24147  | 3.3184   | 3.10139  |
| O  | 3.68252  | 4.26105  | 4.64847  |
| C  | 1.44275  | 3.50768  | 1.97422  |
| C  | 2.35423  | 2.07354  | 3.72155  |
| C  | 0.7488   | 2.42406  | 1.43678  |
| H  | 1.36245  | 4.49481  | 1.53399  |
| C  | 1.6664   | 0.99071  | 3.18188  |
| H  | 2.97143  | 1.96664  | 4.60569  |
| C  | 0.8724   | 1.16475  | 2.04016  |
| H  | 0.11236  | 2.55867  | 0.57167  |
| H  | 1.73021  | 0.00946  | 3.64207  |
| O  | 0.19813  | 0.04554  | 1.59105  |
| P  | -0.07433 | -0.33986 | -0.02434 |
| O  | 0.36395  | 0.57285  | -1.13307 |
| O  | -0.91783 | -1.64514 | -0.00303 |
| O  | -1.81533 | 0.66942  | 0.25236  |
| C  | -2.28736 | 1.66445  | -0.50804 |
| C  | -2.83759 | 2.80452  | 0.12764  |
| C  | -2.31237 | 1.60421  | -1.92331 |
| C  | -3.41893 | 3.82903  | -0.61012 |
| H  | -2.78835 | 2.87242  | 1.21088  |
| C  | -2.88552 | 2.62692  | -2.66409 |
| H  | -1.86028 | 0.75634  | -2.42216 |
| C  | -3.44294 | 3.72771  | -2.00294 |
| H  | -3.84339 | 4.70249  | -0.12902 |
| H  | -2.91076 | 2.59241  | -3.74701 |
| N  | -4.06179 | 4.79775  | -2.79232 |
| O  | -4.06927 | 4.67071  | -4.0193  |
| O  | -4.5409  | 5.7551   | -2.18314 |
| Cu | -2.94068 | -1.45502 | 0.50136  |



|    |          |          |          |                                |          |          |          |
|----|----------|----------|----------|--------------------------------|----------|----------|----------|
| H  | -3.71667 | 4.65679  | -0.06957 | C                              | 4.22562  | 1.82402  | -0.31349 |
| H  | -2.74101 | 2.66993  | -3.74376 | H                              | 4.03106  | 1.63688  | 0.74781  |
| N  | -3.80428 | 4.89419  | -2.73126 | H                              | 4.21593  | 2.91232  | -0.46031 |
| O  | -3.75147 | 4.83265  | -3.96189 | C                              | 3.05001  | 1.52865  | -2.5209  |
| O  | -4.26524 | 5.84352  | -2.09627 | H                              | 3.95282  | 2.07847  | -2.80033 |
| Cu | -3.01801 | -1.31577 | 0.48346  | H                              | 2.20496  | 2.20842  | -2.66384 |
| N  | -5.11642 | -1.3066  | 1.16772  | C                              | 2.85847  | 0.29973  | -3.41691 |
| N  | -2.64615 | -0.9996  | 2.48151  | H                              | 1.84512  | -0.08691 | -3.2789  |
| N  | -3.24585 | -3.47668 | 1.26804  | H                              | 2.97406  | 0.60199  | -4.46788 |
| N  | -3.93876 | -1.33118 | -1.30964 | C                              | 5.22901  | -0.48052 | -3.29663 |
| N  | -4.15874 | -1.73923 | -3.62112 | H                              | 5.32617  | 0.56679  | -3.59442 |
| N  | -2.25124 | -2.41356 | -2.48497 | H                              | 5.60928  | -1.06901 | -4.13917 |
| C  | -5.12661 | -0.7697  | 2.55262  | C                              | 6.11459  | -0.77672 | -2.0725  |
| H  | -5.35274 | -1.5895  | 3.2395   | H                              | 6.20299  | -1.85857 | -1.96075 |
| H  | -5.92777 | -0.03119 | 2.68378  | H                              | 7.12603  | -0.37894 | -2.23951 |
| C  | -3.77523 | -0.13183 | 2.91235  | C                              | 6.07598  | -0.91414 | 0.40409  |
| H  | -3.65216 | 0.81687  | 2.38357  | H                              | 5.64594  | -0.39898 | 1.26909  |
| H  | -3.73374 | 0.0775   | 3.99009  | H                              | 7.16889  | -0.81207 | 0.46733  |
| C  | -2.45458 | -2.2473  | 3.27032  | C                              | 5.68182  | -2.3984  | 0.43761  |
| H  | -3.32721 | -2.39034 | 3.91319  | H                              | 5.80485  | -2.75525 | 1.47028  |
| H  | -1.59296 | -2.14354 | 3.93875  | C                              | 3.796    | -3.76345 | -0.16136 |
| C  | -2.2511  | -3.46743 | 2.35998  | H                              | 2.21945  | 1.29694  | -0.66704 |
| H  | -1.26787 | -3.40941 | 1.88524  | H                              | 3.53254  | -1.64024 | -3.50951 |
| H  | -2.28731 | -4.37983 | 2.97459  | H                              | 2.07766  | -4.80937 | -0.55893 |
| C  | -4.64613 | -3.71816 | 1.68069  | H                              | 4.10215  | -5.80736 | -0.05726 |
| H  | -4.70578 | -3.68967 | 2.77253  | H                              | 5.43746  | -4.86652 | 0.45005  |
| H  | -4.97836 | -4.72093 | 1.38807  | H                              | 1.93741  | -3.10129 | -0.64893 |
| C  | -5.61837 | -2.69146 | 1.06381  | H                              | 6.37714  | -2.97978 | -0.18651 |
| H  | -5.74132 | -2.92219 | 0.00437  | H                              | 1.78799  | -1.6443  | 0.94895  |
| H  | -6.60634 | -2.79441 | 1.5379   |                                |          |          |          |
| C  | -5.68596 | -0.38165 | 0.1619   |                                |          |          |          |
| H  | -5.27554 | 0.6115   | 0.36845  | <b>L<sup>3</sup>-RC1</b>       |          |          |          |
| H  | -6.78097 | -0.31207 | 0.249    | <b>E : -2552.56535424 a.u.</b> |          |          |          |
| C  | -5.30817 | -0.80354 | -1.26895 | O                              | -2.25306 | -0.09259 | -1.60143 |
| H  | -5.41577 | 0.08144  | -1.91203 | O                              | -0.39533 | 6.49275  | 0.17246  |
| C  | -3.47481 | -1.80326 | -2.44278 | N                              | -0.45346 | 5.95078  | -0.93365 |
| H  | -1.78378 | -0.45337 | 2.46186  | C                              | 0.07303  | 4.58323  | -1.04974 |
| H  | -2.96263 | -4.14041 | 0.55199  | O                              | -0.94004 | 6.46493  | -1.94094 |
| H  | -1.78697 | -2.44975 | -3.38344 | C                              | 0.68236  | 3.99464  | 0.0599   |
| H  | -3.88025 | -2.31734 | -4.40219 | C                              | -0.05946 | 3.90257  | -2.2619  |
| H  | -5.10784 | -1.39857 | -3.6486  | C                              | 1.1375   | 2.68161  | -0.02947 |
| H  | -1.63059 | -2.23277 | -1.6895  | H                              | 0.80548  | 4.56951  | 0.97032  |
| H  | -6.0223  | -1.55757 | -1.6331  | C                              | 0.39145  | 2.58903  | -2.34763 |
| Cu | 3.49911  | -0.83786 | -0.76384 | H                              | -0.50996 | 4.39996  | -3.1126  |
| N  | 5.54417  | -0.24113 | -0.81006 | C                              | 0.97009  | 1.97453  | -1.22898 |
| N  | 3.1459   | 1.15399  | -1.08022 | H                              | 1.63293  | 2.21293  | 0.81325  |
| N  | 3.7997   | -0.78102 | -3.03531 | H                              | 0.31609  | 2.03111  | -3.27558 |
| N  | 4.29997  | -2.55333 | -0.0279  | O                              | 1.38843  | 0.67486  | -1.39113 |
| N  | 4.46349  | -4.8956  | 0.18811  | P                              | 1.2354   | -0.52775 | -0.26258 |
| N  | 2.545    | -3.92156 | -0.68929 | O                              | -0.05077 | -0.29632 | 0.52205  |
| C  | 5.59198  | 1.2513   | -0.72121 | O                              | 1.49399  | -1.80332 | -1.00461 |
| H  | 5.89053  | 1.64274  | -1.69628 | O                              | 2.40183  | -0.20008 | 0.83469  |
| H  | 6.36389  | 1.56993  | -0.01101 | C                              | 3.75691  | -0.4779  | 0.69715  |
|    |          |          |          | C                              | 4.40284  | -0.52996 | -0.54167 |

|    |          |          |          |                                |          |          |          |
|----|----------|----------|----------|--------------------------------|----------|----------|----------|
| C  | 4.46     | -0.65865 | 1.89146  | C                              | -2.81327 | -5.16564 | -1.19076 |
| C  | 5.7736   | -0.77256 | -0.58019 | H                              | -2.05699 | -5.37711 | -0.42892 |
| H  | 3.85078  | -0.38941 | -1.46313 | H                              | -2.97036 | -6.08566 | -1.76452 |
| C  | 5.82894  | -0.89688 | 1.85421  | H                              | -2.9309  | -3.68569 | -2.72189 |
| H  | 3.92655  | -0.6091  | 2.83473  |                                |          |          |          |
| C  | 6.4685   | -0.95306 | 0.61501  | <b>L<sup>3</sup>-RC2</b>       |          |          |          |
| H  | 6.30519  | -0.82031 | -1.52273 | <b>E : -2552.55896771 a.u.</b> |          |          |          |
| H  | 6.40056  | -1.04094 | 2.76275  | O                              | -1.93417 | 0.18175  | -2.48116 |
| N  | 7.91628  | -1.21028 | 0.56894  | O                              | -0.24103 | 6.11341  | 2.04788  |
| O  | 8.50407  | -1.36217 | 1.64075  | N                              | -0.30883 | 5.96923  | 0.82583  |
| O  | 8.45386  | -1.25965 | -0.53814 | C                              | 0.10689  | 4.67117  | 0.26885  |
| Cu | -1.98048 | 0.30885  | 0.25509  | O                              | -0.71356 | 6.82492  | 0.03933  |
| N  | -3.45065 | -1.2598  | 1.14629  | C                              | 0.59522  | 3.69005  | 1.13351  |
| N  | -3.72804 | 1.53834  | 0.37468  | C                              | -0.00741 | 4.45205  | -1.10602 |
| N  | -1.85443 | 0.84158  | 2.26879  | C                              | 0.96592  | 2.45158  | 0.6128   |
| N  | -2.27748 | -4.12933 | -2.08697 | H                              | 0.69134  | 3.90629  | 2.1908   |
| N  | -0.03395 | -4.15387 | -1.41768 | C                              | 0.35665  | 3.21241  | -1.62329 |
| N  | -0.89695 | -2.32588 | -2.5545  | H                              | -0.37942 | 5.24137  | -1.7482  |
| C  | -4.77596 | -0.61137 | 1.15477  | C                              | 0.83579  | 2.22086  | -0.76191 |
| H  | -5.01629 | -0.28999 | 2.17251  | H                              | 1.3608   | 1.67932  | 1.26331  |
| H  | -5.56923 | -1.3165  | 0.87473  | H                              | 0.27197  | 2.99565  | -2.68222 |
| C  | -4.8523  | 0.58622  | 0.18659  | O                              | 1.22421  | 1.03264  | -1.34943 |
| H  | -4.77712 | 0.23594  | -0.84588 | P                              | 0.9085   | -0.4707  | -0.81694 |
| H  | -5.82163 | 1.08817  | 0.31548  | O                              | -0.40438 | -0.55791 | -0.05266 |
| C  | -3.73703 | 2.31716  | 1.64427  | O                              | 1.19197  | -1.41177 | -1.95257 |
| H  | -4.52311 | 1.9205   | 2.29285  | O                              | 2.02053  | -0.71938 | 0.39224  |
| H  | -3.98842 | 3.36634  | 1.45647  | C                              | 3.4057   | -0.60859 | 0.26806  |
| C  | -2.36802 | 2.2312   | 2.33824  | C                              | 4.0696   | -0.55147 | -0.96156 |
| H  | -1.64467 | 2.8654   | 1.81575  | C                              | 4.10953  | -0.57903 | 1.47658  |
| H  | -2.44301 | 2.59253  | 3.37295  | C                              | 5.46035  | -0.46071 | -0.9726  |
| C  | -2.5293  | -0.13321 | 3.17141  | H                              | 3.51821  | -0.58664 | -1.89337 |
| H  | -3.4509  | 0.32462  | 3.54047  | C                              | 5.49697  | -0.49426 | 1.46428  |
| H  | -1.90764 | -0.32759 | 4.05239  | H                              | 3.56249  | -0.6175  | 2.41328  |
| C  | -2.83653 | -1.46683 | 2.46822  | C                              | 6.15527  | -0.43651 | 0.23523  |
| H  | -1.89943 | -2.0091  | 2.30262  | H                              | 6.00624  | -0.41348 | -1.90716 |
| H  | -3.45812 | -2.07781 | 3.14253  | H                              | 6.06865  | -0.46807 | 2.38391  |
| C  | -3.34047 | -2.40625 | 0.22241  | N                              | 7.62515  | -0.35002 | 0.21555  |
| H  | -2.2702  | -2.5801  | 0.08322  | O                              | 8.20938  | -0.3372  | 1.29958  |
| H  | -3.72492 | -2.05696 | -0.7412  | O                              | 8.17947  | -0.30007 | -0.88237 |
| C  | -1.06634 | -3.54286 | -2.01722 | Cu                             | -2.30129 | -0.18987 | -0.64687 |
| H  | -3.69974 | 2.16275  | -0.42863 | N                              | -3.3322  | -1.05248 | 1.10635  |
| H  | -0.84754 | 0.8216   | 2.42376  | N                              | -4.27097 | 0.19557  | -1.26287 |
| H  | 0.06168  | -1.98402 | -2.48749 | N                              | -2.68845 | 1.74932  | 0.50191  |
| H  | 0.77945  | -3.5781  | -1.18093 | N                              | -0.54349 | -5.32306 | 0.0818   |
| H  | 0.01284  | -5.15807 | -1.32109 | N                              | 0.90778  | -3.61095 | 0.67719  |
| H  | -1.58392 | -1.56967 | -2.33436 | N                              | 0.47493  | -4.02128 | -1.56589 |
| H  | -1.93445 | 0.63353  | -2.16113 | C                              | -4.8     | -1.04505 | 0.79959  |
| C  | -4.02767 | -3.72137 | 0.62968  | H                              | -5.2657  | -0.21714 | 1.33836  |
| H  | -5.04504 | -3.52135 | 0.99023  | H                              | -5.2795  | -1.95411 | 1.18103  |
| H  | -3.48828 | -4.17975 | 1.46919  | C                              | -5.08249 | -0.89735 | -0.70526 |
| C  | -4.13501 | -4.74149 | -0.52353 | H                              | -4.80392 | -1.81054 | -1.23972 |
| H  | -4.81386 | -4.35655 | -1.2987  | H                              | -6.16023 | -0.7387  | -0.8588  |
| H  | -4.60913 | -5.65264 | -0.1403  | C                              | -4.71545 | 1.57125  | -0.93267 |

|   |          |          |          |    |          |          |          |
|---|----------|----------|----------|----|----------|----------|----------|
| H | -5.48705 | 1.506    | -0.15895 | O  | 0.27017  | 1.47122  | -0.5967  |
| H | -5.18912 | 2.03718  | -1.8037  | C  | 1.11012  | 2.42623  | -0.12729 |
| C | -3.55473 | 2.46192  | -0.4557  | C  | 1.53653  | 2.47086  | 1.21609  |
| H | -2.92258 | 2.71792  | -1.3104  | C  | 1.49306  | 3.45583  | -1.01188 |
| H | -3.97356 | 3.39422  | -0.04697 | C  | 2.32555  | 3.52561  | 1.65842  |
| C | -3.26354 | 1.39759  | 1.81204  | H  | 1.22636  | 1.68038  | 1.88978  |
| H | -4.33868 | 1.60092  | 1.80385  | C  | 2.27321  | 4.51999  | -0.56551 |
| H | -2.85073 | 2.02208  | 2.61433  | H  | 1.20293  | 3.38688  | -2.05669 |
| C | -2.98498 | -0.07233 | 2.18147  | C  | 2.67921  | 4.5454   | 0.76907  |
| H | -1.91347 | -0.1906  | 2.36862  | H  | 2.66093  | 3.57877  | 2.68756  |
| H | -3.51943 | -0.32005 | 3.11249  | H  | 2.58112  | 5.313    | -1.23657 |
| C | -2.85646 | -2.40351 | 1.52474  | N  | 3.48858  | 5.6698   | 1.24973  |
| H | -3.36799 | -2.68507 | 2.46078  | O  | 3.74912  | 6.57288  | 0.4511   |
| H | -1.79012 | -2.30039 | 1.74673  | O  | 3.85623  | 5.65152  | 2.42645  |
| C | 0.27523  | -4.30817 | -0.27794 | Cu | -1.54428 | -1.69639 | 0.45398  |
| H | -4.07914 | 0.08585  | -2.25963 | N  | -3.73087 | -1.10042 | 0.47468  |
| H | -1.80913 | 2.24644  | 0.61164  | N  | -2.07676 | -2.73411 | 2.13574  |
| H | 0.93353  | -3.12115 | -1.81488 | N  | -2.33461 | -3.43626 | -0.57209 |
| H | 1.42479  | -2.76025 | 0.47136  | N  | -3.88214 | 3.61812  | -1.17023 |
| H | 1.03255  | -4.00662 | 1.59747  | N  | -1.99928 | 2.3947   | -1.86456 |
| H | -0.19565 | -4.35753 | -2.2457  | N  | -1.77588 | 4.12556  | -0.35853 |
| H | -1.12976 | -0.24123 | -2.82185 | C  | -4.29766 | -1.67163 | 1.71825  |
| C | -3.07206 | -3.50955 | 0.48099  | H  | -4.84113 | -2.59017 | 1.4831   |
| H | -2.44452 | -3.31324 | -0.39851 | H  | -5.03411 | -0.99525 | 2.17081  |
| H | -4.10754 | -3.48679 | 0.12617  | C  | -3.19218 | -1.95993 | 2.74877  |
| C | -2.83221 | -4.93729 | 1.01583  | H  | -2.75774 | -1.02143 | 3.10725  |
| H | -3.25064 | -5.65266 | 0.29533  | H  | -3.61499 | -2.4894  | 3.61354  |
| H | -3.3997  | -5.08655 | 1.94401  | C  | -2.39797 | -4.15737 | 1.80192  |
| C | -1.37539 | -5.34204 | 1.29929  | H  | -3.47396 | -4.30293 | 1.93137  |
| H | -0.9228  | -4.67983 | 2.03957  | H  | -1.90555 | -4.83272 | 2.50911  |
| H | -1.34445 | -6.35365 | 1.71423  | C  | -1.97464 | -4.51714 | 0.3665   |
| H | -0.873   | -5.90831 | -0.67764 | H  | -0.88733 | -4.62337 | 0.31268  |

### L<sup>3</sup>-1-TS1

E : -2552.50718582 a.u.

|   |         |          |          |   |          |          |          |
|---|---------|----------|----------|---|----------|----------|----------|
| O | 0.59773 | -2.13346 | -0.16081 | H | -4.35637 | -3.85056 | -0.17073 |
| O | 6.62692 | -4.18919 | -1.64889 | H | -4.01854 | -3.6003  | -1.86929 |
| N | 6.27667 | -3.65766 | -0.5942  | C | -4.17691 | -1.75669 | -0.77163 |
| C | 5.13312 | -2.73356 | -0.64041 | H | -3.69597 | -1.2201  | -1.59479 |
| O | 6.81336 | -3.85083 | 0.49816  | H | -5.2669  | -1.6879  | -0.91375 |
| C | 4.48542 | -2.5166  | -1.85878 | C | -3.76414 | 0.38576  | 0.43915  |
| C | 4.72773 | -2.10072 | 0.53526  | H | -2.933   | 0.70121  | -0.19582 |
| C | 3.39254 | -1.65794 | -1.89652 | H | -3.51909 | 0.71749  | 1.45277  |
| H | 4.83814 | -3.01979 | -2.75071 | C | -2.55758 | 3.36365  | -1.14451 |
| C | 3.6366  | -1.23678 | 0.49097  | H | -1.26877 | -2.69016 | 2.75576  |
| H | 5.26842 | -2.28041 | 1.4565   | H | -1.77829 | -3.50158 | -1.4213  |
| C | 2.9673  | -1.03304 | -0.72118 | H | -0.76599 | 4.00059  | -0.36604 |
| H | 2.85976 | -1.46846 | -2.82197 | H | -1.107   | 1.96487  | -1.53949 |
| H | 3.30807 | -0.70887 | 1.38101  | H | -2.54875 | 1.86844  | -2.52711 |
| O | 1.93186 | -0.1239  | -0.79132 | H | -2.16665 | 4.69135  | 0.38163  |
| P | 0.38939 | -0.31475 | -0.20355 | H | 1.20888  | -2.38211 | 0.5526   |
| O | -0.9107 | -0.56226 | -1.0751  | C | -5.08426 | 1.05011  | -0.03279 |
| O | 0.03732 | -0.23424 | 1.30402  | H | -5.23239 | 1.96854  | 0.54805  |
|   |         |          |          | H | -5.93504 | 0.40612  | 0.21938  |

|   |          |         |          |
|---|----------|---------|----------|
| C | -5.11588 | 1.39101 | -1.54418 |
| H | -6.08127 | 1.11244 | -1.98264 |
| H | -4.37591 | 0.78396 | -2.07667 |
| C | -4.92861 | 2.88136 | -1.90425 |
| H | -4.77081 | 2.98573 | -2.98576 |
| H | -5.85006 | 3.42085 | -1.67138 |
| H | -4.15807 | 4.52109 | -0.80626 |

**L<sup>3</sup>-1-IM**

**E : -2552.50991806 a.u.**

|    |          |          |          |
|----|----------|----------|----------|
| O  | 0.69441  | -2.30497 | -0.33286 |
| O  | 6.92938  | -3.74959 | -2.11043 |
| N  | 6.56089  | -3.37776 | -0.99605 |
| C  | 5.33917  | -2.55929 | -0.91749 |
| O  | 7.13722  | -3.64607 | 0.05899  |
| C  | 4.64605  | -2.26365 | -2.09312 |
| C  | 4.91059  | -2.10354 | 0.32928  |
| C  | 3.48499  | -1.50181 | -2.01621 |
| H  | 5.01662  | -2.63244 | -3.04171 |
| C  | 3.75065  | -1.33528 | 0.40114  |
| H  | 5.48535  | -2.3417  | 1.21601  |
| C  | 3.04256  | -1.04809 | -0.77099 |
| H  | 2.91683  | -1.25506 | -2.9065  |
| H  | 3.40207  | -0.93999 | 1.35029  |
| O  | 1.93585  | -0.2209  | -0.71879 |
| P  | 0.42373  | -0.6123  | -0.15126 |
| O  | -0.95792 | -0.70228 | -0.9138  |
| O  | 0.1003   | -0.58381 | 1.38557  |
| O  | 0.22688  | 1.3071   | -0.38398 |
| C  | 1.02466  | 2.25864  | 0.13235  |
| C  | 1.37194  | 2.2882   | 1.50093  |
| C  | 1.46911  | 3.30469  | -0.70909 |
| C  | 2.12086  | 3.33999  | 2.01039  |
| H  | 1.03292  | 1.48114  | 2.14016  |
| C  | 2.20899  | 4.36717  | -0.19686 |
| H  | 1.27285  | 3.24227  | -1.77691 |
| C  | 2.52259  | 4.37873  | 1.16289  |
| H  | 2.39068  | 3.37859  | 3.05931  |
| H  | 2.5603   | 5.16924  | -0.83522 |
| N  | 3.28784  | 5.49923  | 1.71118  |
| O  | 3.59393  | 6.41774  | 0.94586  |
| O  | 3.57744  | 5.46728  | 2.91023  |
| Cu | -1.77341 | -1.23371 | 0.87287  |
| N  | -3.856   | -1.03066 | 0.30797  |
| N  | -2.54871 | -1.79243 | 2.70376  |
| N  | -2.10516 | -3.34083 | 0.3744   |
| N  | -3.66617 | 3.08481  | -2.26452 |
| N  | -1.61369 | 1.93993  | -2.28041 |
| N  | -1.85125 | 3.87296  | -1.05498 |
| C  | -4.67625 | -1.27865 | 1.52292  |
| H  | -5.06538 | -2.29882 | 1.49029  |
| H  | -5.55283 | -0.61952 | 1.55047  |
| C  | -3.84555 | -1.07138 | 2.80186  |

|   |          |          |          |
|---|----------|----------|----------|
| H | -3.61219 | -0.00963 | 2.93425  |
| H | -4.42377 | -1.39631 | 3.67785  |
| C | -2.65438 | -3.28453 | 2.79645  |
| H | -3.71511 | -3.54911 | 2.75845  |
| H | -2.28268 | -3.62595 | 3.76808  |
| C | -1.88561 | -4.00004 | 1.66863  |
| H | -0.81037 | -3.94773 | 1.86384  |
| H | -2.17317 | -5.06251 | 1.66983  |
| C | -3.42689 | -3.46034 | -0.25523 |
| H | -4.12162 | -3.9184  | 0.45641  |
| H | -3.40134 | -4.12749 | -1.12549 |
| C | -3.96194 | -2.08892 | -0.73092 |
| H | -3.35316 | -1.75351 | -1.57465 |
| H | -4.99714 | -2.21385 | -1.08021 |
| C | -3.9817  | 0.36532  | -0.208   |
| H | -3.03677 | 0.58658  | -0.70613 |
| H | -4.03001 | 1.00837  | 0.67669  |
| C | -2.3773  | 2.95005  | -1.88188 |
| H | -1.90598 | -1.44319 | 3.41324  |
| H | -1.32991 | -3.50635 | -0.26581 |
| H | -0.87283 | 3.81851  | -0.77977 |
| H | -0.81772 | 1.63835  | -1.66396 |
| H | -1.98665 | 1.23608  | -2.90042 |
| H | -2.42514 | 4.5674   | -0.59884 |
| H | 1.49235  | -2.61104 | 0.12855  |
| C | -5.16788 | 0.67025  | -1.16238 |
| H | -5.64646 | 1.60696  | -0.85276 |
| H | -5.94027 | -0.09993 | -1.05787 |
| C | -4.7458  | 0.77165  | -2.64659 |
| H | -5.55078 | 0.40813  | -3.29606 |
| H | -3.90015 | 0.09877  | -2.83219 |
| C | -4.42514 | 2.1939   | -3.16409 |
| H | -3.92209 | 2.13147  | -4.13768 |
| H | -5.3649  | 2.72445  | -3.33578 |
| H | -4.07532 | 3.997    | -2.10965 |

**L<sup>3</sup>-1-TS2**

**E : -2552.51298512 a.u.**

|   |          |          |          |
|---|----------|----------|----------|
| O | -0.71555 | -2.44588 | 0.19703  |
| O | -7.04765 | -3.57984 | 2.16168  |
| N | -6.72039 | -3.2192  | 1.03066  |
| C | -5.44477 | -2.49517 | 0.88732  |
| O | -7.38142 | -3.4193  | 0.01139  |
| C | -4.67369 | -2.25539 | 2.02632  |
| C | -5.05051 | -2.06262 | -0.37871 |
| C | -3.47529 | -1.56261 | 1.89307  |
| H | -5.01818 | -2.60619 | 2.99142  |
| C | -3.84997 | -1.36574 | -0.50776 |
| H | -5.68368 | -2.25934 | -1.23547 |
| C | -3.07208 | -1.12174 | 0.62952  |
| H | -2.85296 | -1.35108 | 2.75578  |
| H | -3.52889 | -0.98378 | -1.47203 |
| O | -1.94076 | -0.32979 | 0.52628  |



|    |          |          |          |
|----|----------|----------|----------|
| P  | -0.4161  | -0.78411 | 0.05669  |
| O  | 0.93622  | -0.86152 | 0.86328  |
| O  | -0.03604 | -0.66557 | -1.46238 |
| O  | -0.19674 | 1.19626  | 0.36951  |
| C  | -0.9702  | 2.15001  | -0.16549 |
| C  | -1.13933 | 2.2682   | -1.56488 |
| C  | -1.58522 | 3.1062   | 0.67704  |
| C  | -1.85707 | 3.32719  | -2.09966 |
| H  | -0.69552 | 1.51214  | -2.20247 |
| C  | -2.29797 | 4.17598  | 0.1423   |
| H  | -1.5396  | 2.96397  | 1.75462  |
| C  | -2.41596 | 4.28504  | -1.24435 |
| H  | -1.98318 | 3.43485  | -3.17071 |
| H  | -2.77417 | 4.91148  | 0.77999  |
| N  | -3.13508 | 5.42274  | -1.81445 |
| O  | -3.59307 | 6.26536  | -1.03667 |
| O  | -3.23761 | 5.48369  | -3.04323 |
| Cu | 1.88069  | -1.03648 | -0.95168 |
| N  | 3.88028  | -0.91221 | -0.24601 |
| N  | 2.77559  | -1.29699 | -2.81045 |
| N  | 2.2116   | -3.22547 | -0.78029 |
| N  | 3.38261  | 2.76395  | 2.84538  |
| N  | 1.36548  | 1.58965  | 2.54935  |
| N  | 1.64733  | 3.66254  | 1.59557  |
| C  | 4.7982   | -0.95393 | -1.41871 |
| H  | 5.20615  | -1.96214 | -1.51585 |
| H  | 5.65711  | -0.28866 | -1.26869 |
| C  | 4.06135  | -0.5573  | -2.70792 |
| H  | 3.81874  | 0.51074  | -2.6951  |
| H  | 4.70771  | -0.74115 | -3.57722 |
| C  | 2.92134  | -2.7568  | -3.11872 |
| H  | 3.98284  | -3.01106 | -3.04526 |
| H  | 2.62753  | -2.94929 | -4.15584 |
| C  | 2.09418  | -3.65614 | -2.178   |
| H  | 1.03384  | -3.58076 | -2.43697 |
| H  | 2.40475  | -4.69966 | -2.34234 |
| C  | 3.49471  | -3.41202 | -0.09077 |
| H  | 4.24769  | -3.74334 | -0.81349 |
| H  | 3.4368   | -4.20417 | 0.66605  |
| C  | 3.95476  | -2.11986 | 0.62492  |
| H  | 3.28333  | -1.93349 | 1.46695  |
| H  | 4.97102  | -2.26912 | 1.01648  |
| C  | 3.93848  | 0.39188  | 0.48712  |
| H  | 2.9552   | 0.52144  | 0.94084  |
| H  | 4.03582  | 1.16229  | -0.28437 |
| C  | 2.13224  | 2.65368  | 2.34369  |
| H  | 2.17583  | -0.85456 | -3.50511 |
| H  | 1.40928  | -3.51948 | -0.226   |
| H  | 0.70771  | 3.60718  | 1.20745  |
| H  | 0.6412   | 1.36068  | 1.82063  |
| H  | 1.70933  | 0.81502  | 3.098    |
| H  | 2.23812  | 4.41472  | 1.27179  |
| H  | -1.53395 | -2.72649 | -0.24454 |

|   |         |          |         |
|---|---------|----------|---------|
| C | 5.04464 | 0.56024  | 1.56255 |
| H | 5.52935 | 1.53471  | 1.42741 |
| H | 5.83625 | -0.18193 | 1.41001 |
| C | 4.50781 | 0.44783  | 3.00814 |
| H | 5.27377 | 0.01906  | 3.66503 |
| H | 3.67461 | -0.26425 | 3.03341 |
| C | 4.09911 | 1.78019  | 3.68066 |
| H | 3.52547 | 1.57633  | 4.594   |
| H | 5.00447 | 2.30476  | 3.99593 |
| H | 3.77795 | 3.69517  | 2.83454 |

### L<sup>3</sup>-1-PC

E : -2552.58897952 a.u.

|    |          |          |          |
|----|----------|----------|----------|
| O  | 0.57042  | -1.48276 | -3.59169 |
| O  | 7.60358  | -0.6728  | -0.96362 |
| N  | 6.68846  | -1.4787  | -0.79849 |
| C  | 5.32163  | -1.03241 | -1.10304 |
| O  | 6.83553  | -2.6347  | -0.39467 |
| C  | 5.10875  | 0.28012  | -1.53194 |
| C  | 4.26826  | -1.93156 | -0.95199 |
| C  | 3.81447  | 0.69328  | -1.82023 |
| H  | 5.94987  | 0.95457  | -1.63749 |
| C  | 2.96979  | -1.51301 | -1.23489 |
| H  | 4.47185  | -2.94018 | -0.61297 |
| C  | 2.74582  | -0.20094 | -1.67619 |
| H  | 3.61245  | 1.70301  | -2.16034 |
| H  | 2.13565  | -2.19019 | -1.08873 |
| O  | 1.50048  | 0.3022   | -1.96817 |
| P  | 0.13771  | -0.53999 | -2.34594 |
| O  | -0.84815 | 0.46759  | -2.84523 |
| O  | -0.23044 | -1.46082 | -1.16853 |
| O  | -1.30443 | 0.69757  | 0.7726   |
| C  | -0.3287  | 1.42798  | 1.28934  |
| C  | -0.62456 | 2.7361   | 1.75506  |
| C  | 1.00922  | 0.96912  | 1.40364  |
| C  | 0.36226  | 3.5435   | 2.29586  |
| H  | -1.64762 | 3.092    | 1.6754   |
| C  | 1.99937  | 1.77466  | 1.95153  |
| H  | 1.26779  | -0.00966 | 1.0092   |
| C  | 1.67257  | 3.05878  | 2.39474  |
| H  | 0.13808  | 4.54209  | 2.65232  |
| H  | 3.02378  | 1.4294   | 2.02898  |
| N  | 2.71235  | 3.90822  | 2.96151  |
| O  | 3.85328  | 3.44355  | 3.05465  |
| O  | 2.39777  | 5.04925  | 3.31648  |
| Cu | -1.2832  | -1.20944 | 0.57282  |
| N  | -3.49389 | -1.46234 | 1.27735  |
| N  | -0.87157 | -1.61935 | 2.65999  |
| N  | -1.44804 | -3.28345 | 0.50697  |
| N  | -4.1417  | 2.36912  | -2.55955 |
| N  | -1.88331 | 2.95246  | -2.6859  |
| N  | -3.51097 | 4.59105  | -2.41134 |
| C  | -3.37302 | -1.64026 | 2.75312  |

|   |          |          |          |
|---|----------|----------|----------|
| H | -3.47096 | -2.70182 | 2.99599  |
| H | -4.20906 | -1.14533 | 3.26307  |
| C | -2.06884 | -1.09381 | 3.35407  |
| H | -2.03377 | -0.00615 | 3.25501  |
| H | -2.05396 | -1.33877 | 4.42605  |
| C | -0.59322 | -3.06857 | 2.8314   |
| H | -1.41702 | -3.52749 | 3.38614  |
| H | 0.30824  | -3.22457 | 3.43345  |
| C | -0.41291 | -3.75121 | 1.46424  |
| H | 0.55514  | -3.47283 | 1.03626  |
| H | -0.42774 | -4.84386 | 1.57837  |
| C | -2.81947 | -3.81119 | 0.74035  |
| H | -2.8499  | -4.25639 | 1.73765  |
| H | -3.04141 | -4.62138 | 0.0366   |
| C | -3.88983 | -2.7157  | 0.59869  |
| H | -4.02606 | -2.49096 | -0.46156 |
| H | -4.8503  | -3.10637 | 0.97453  |
| C | -4.40661 | -0.31571 | 0.99929  |
| H | -3.90981 | 0.56378  | 1.42005  |
| H | -5.34724 | -0.46752 | 1.55379  |
| C | -3.16012 | 3.28505  | -2.56272 |
| H | -0.06279 | -1.05883 | 2.92359  |
| H | -1.14077 | -3.47291 | -0.44614 |
| H | -2.79461 | 5.3045   | -2.41384 |
| H | -1.19229 | 3.67831  | -2.82318 |
| H | -1.51517 | 1.97522  | -2.68195 |
| H | -4.43188 | 4.90087  | -2.69153 |
| H | 1.05227  | -2.28683 | -3.33927 |
| C | -4.77519 | -0.02138 | -0.46394 |
| H | -5.37947 | 0.89604  | -0.40975 |
| H | -5.45402 | -0.7912  | -0.85477 |
| C | -3.59727 | 0.18555  | -1.42507 |
| H | -3.16678 | -0.77924 | -1.71774 |
| H | -2.79316 | 0.72934  | -0.92274 |
| C | -3.95851 | 0.91398  | -2.72801 |
| H | -3.17165 | 0.75869  | -3.46829 |
| H | -4.89289 | 0.53813  | -3.15735 |
| H | -5.05451 | 2.69423  | -2.26946 |

**L<sup>3</sup>-2-TS1**

**E : -2552.50713333 a.u.**

|   |         |          |          |
|---|---------|----------|----------|
| O | 0.24266 | -1.91592 | -0.26437 |
| O | 5.91306 | -4.84417 | -1.81429 |
| N | 5.61767 | -4.31882 | -0.74006 |
| C | 4.63532 | -3.22408 | -0.7611  |
| O | 6.08162 | -4.65078 | 0.35226  |
| C | 4.05893 | -2.85341 | -1.97818 |
| C | 4.30651 | -2.58787 | 0.43653  |
| C | 3.11357 | -1.8339  | -1.99271 |
| H | 4.35028 | -3.36498 | -2.88736 |
| C | 3.36493 | -1.56219 | 0.41625  |
| H | 4.79256 | -2.8895  | 1.35641  |
| C | 2.76337 | -1.20272 | -0.79598 |

|    |          |          |          |
|----|----------|----------|----------|
| H  | 2.63896  | -1.5217  | -2.91657 |
| H  | 3.10489  | -1.0266  | 1.32422  |
| O  | 1.88268  | -0.14426 | -0.84376 |
| P  | 0.35645  | -0.06562 | -0.1886  |
| O  | -1.01375 | -0.0711  | -1.01179 |
| O  | 0.05985  | -0.05231 | 1.33294  |
| O  | 0.53867  | 1.69018  | -0.46918 |
| C  | 1.625    | 2.41452  | -0.03952 |
| C  | 2.044    | 2.39185  | 1.30075  |
| C  | 2.26116  | 3.25234  | -0.96711 |
| C  | 3.09902  | 3.20321  | 1.70609  |
| H  | 1.53269  | 1.7429   | 2.00296  |
| C  | 3.30881  | 4.07266  | -0.56307 |
| H  | 1.93016  | 3.24288  | -2.00076 |
| C  | 3.71628  | 4.03733  | 0.77186  |
| H  | 3.44152  | 3.20737  | 2.73394  |
| H  | 3.81524  | 4.72694  | -1.26226 |
| N  | 4.81741  | 4.9059   | 1.20684  |
| O  | 5.329    | 5.64967  | 0.36739  |
| O  | 5.16591  | 4.84423  | 2.38807  |
| Cu | -1.74059 | -1.23804 | 0.48516  |
| N  | -3.93743 | -0.63636 | 0.63954  |
| N  | -2.17823 | -2.24609 | 2.20218  |
| N  | -2.65967 | -3.01005 | -0.46104 |
| N  | -3.78553 | 3.6598   | -1.41075 |
| N  | -2.40803 | 1.97722  | -2.28875 |
| N  | -1.60137 | 3.39397  | -0.66663 |
| C  | -4.4129  | -1.17702 | 1.93829  |
| H  | -4.97771 | -2.0962  | 1.76527  |
| H  | -5.10918 | -0.48405 | 2.42678  |
| C  | -3.23351 | -1.44979 | 2.88592  |
| H  | -2.766   | -0.50776 | 3.18965  |
| H  | -3.58955 | -1.95754 | 3.79265  |
| C  | -2.53374 | -3.67337 | 1.92841  |
| H  | -3.59631 | -3.80613 | 2.14909  |
| H  | -1.98912 | -4.33507 | 2.60972  |
| C  | -2.23162 | -4.0696  | 0.47259  |
| H  | -1.1539  | -4.1865  | 0.33186  |
| H  | -2.70618 | -5.03922 | 0.26165  |
| C  | -4.10838 | -2.81366 | -0.63509 |
| H  | -4.64248 | -3.3976  | 0.12036  |
| H  | -4.45018 | -3.1932  | -1.60572 |
| C  | -4.49352 | -1.32315 | -0.54696 |
| H  | -4.08136 | -0.81412 | -1.42327 |
| H  | -5.59014 | -1.24161 | -0.59641 |
| C  | -3.9957  | 0.85143  | 0.57487  |
| H  | -3.20121 | 1.15422  | -0.10278 |
| H  | -3.70176 | 1.20446  | 1.56817  |
| C  | -2.60193 | 3.01281  | -1.46422 |
| H  | -1.31571 | -2.18801 | 2.74343  |
| H  | -2.1754  | -3.11107 | -1.34968 |
| H  | -0.74386 | 2.80872  | -0.62999 |
| H  | -1.72514 | 1.24282  | -2.02033 |

|   |          |          |          |
|---|----------|----------|----------|
| H | -3.07494 | 1.77712  | -3.01902 |
| H | -1.79367 | 3.97494  | 0.1384   |
| H | 0.8494   | -2.30312 | 0.38835  |
| C | -5.34037 | 1.51173  | 0.16591  |
| H | -5.4258  | 2.46414  | 0.70467  |
| H | -6.17417 | 0.89985  | 0.53161  |
| C | -5.52828 | 1.77214  | -1.35013 |
| H | -6.59148 | 1.69462  | -1.60733 |
| H | -5.03321 | 0.98808  | -1.9301  |
| C | -5.09158 | 3.16017  | -1.87513 |
| H | -5.13211 | 3.16656  | -2.97196 |
| H | -5.80869 | 3.91384  | -1.53967 |
| H | -3.77971 | 4.56216  | -0.95368 |

**L<sup>3</sup>-2-IM**

**E : -2552.52995329 a.u.**

|    |          |          |          |
|----|----------|----------|----------|
| O  | -0.07024 | 0.37193  | 2.53053  |
| O  | -6.39571 | -4.34115 | -0.67945 |
| N  | -5.41645 | -3.95467 | -1.32221 |
| C  | -4.45999 | -3.07563 | -0.65205 |
| O  | -5.19122 | -4.2652  | -2.49696 |
| C  | -4.67884 | -2.70407 | 0.67799  |
| C  | -3.34001 | -2.62583 | -1.35254 |
| C  | -3.75999 | -1.87678 | 1.30619  |
| H  | -5.5572  | -3.06544 | 1.19899  |
| C  | -2.42151 | -1.7962  | -0.72013 |
| H  | -3.20012 | -2.93068 | -2.38273 |
| C  | -2.6208  | -1.41472 | 0.61978  |
| H  | -3.90544 | -1.57069 | 2.33717  |
| H  | -1.53967 | -1.46404 | -1.25226 |
| O  | -1.80296 | -0.5889  | 1.31553  |
| P  | -0.14267 | -0.02592 | 0.9413   |
| O  | 1.35893  | 0.58531  | 0.63734  |
| O  | 0.25687  | -1.45337 | 0.38856  |
| O  | -0.81242 | 1.21345  | -0.02965 |
| C  | -2.08039 | 1.77189  | 0.08752  |
| C  | -2.95907 | 1.66228  | -0.99257 |
| C  | -2.41147 | 2.53372  | 1.21358  |
| C  | -4.19081 | 2.31105  | -0.94651 |
| H  | -2.68003 | 1.06472  | -1.85343 |
| C  | -3.64294 | 3.17729  | 1.26842  |
| H  | -1.70701 | 2.61513  | 2.03482  |
| C  | -4.51581 | 3.05769  | 0.1852   |
| H  | -4.89527 | 2.24167  | -1.76637 |
| H  | -3.93109 | 3.77184  | 2.12677  |
| N  | -5.81453 | 3.74926  | 0.23651  |
| O  | -6.08156 | 4.3874   | 1.25579  |
| O  | -6.55435 | 3.65028  | -0.74264 |
| Cu | 2.17116  | -1.12295 | 0.15006  |
| N  | 4.17367  | -0.53262 | -0.48063 |
| N  | 2.77118  | -2.99027 | -0.58574 |
| N  | 3.30583  | -1.85208 | 1.9776   |
| N  | 3.13657  | 3.96339  | -1.4543  |

|   |          |          |          |
|---|----------|----------|----------|
| N | 2.26326  | 3.08098  | 0.53851  |
| N | 1.02309  | 2.99499  | -1.39505 |
| C | 4.78875  | -1.68232 | -1.20195 |
| H | 5.49172  | -2.18847 | -0.53738 |
| H | 5.37792  | -1.3376  | -2.0601  |
| C | 3.71763  | -2.67489 | -1.6847  |
| H | 3.13131  | -2.23378 | -2.498   |
| H | 4.20415  | -3.57758 | -2.08001 |
| C | 3.33228  | -3.85627 | 0.49483  |
| H | 4.40892  | -3.95548 | 0.32787  |
| H | 2.91553  | -4.86626 | 0.4226   |
| C | 3.0602   | -3.30213 | 1.90583  |
| H | 2.00671  | -3.45192 | 2.16134  |
| H | 3.66396  | -3.8784  | 2.62361  |
| C | 4.69623  | -1.38461 | 1.84708  |
| H | 5.33624  | -2.22589 | 1.56396  |
| H | 5.08992  | -1.01976 | 2.8039   |
| C | 4.81899  | -0.23468 | 0.82453  |
| H | 4.30491  | 0.64065  | 1.23146  |
| H | 5.88218  | 0.02096  | 0.70189  |
| C | 3.98561  | 0.65961  | -1.36471 |
| H | 3.1402   | 1.20451  | -0.95277 |
| H | 3.65506  | 0.25952  | -2.3287  |
| C | 2.1496   | 3.35643  | -0.76257 |
| H | 1.92961  | -3.41926 | -0.96716 |
| H | 2.85697  | -1.4587  | 2.80034  |
| H | 0.33632  | 2.41961  | -0.88868 |
| H | 1.81977  | 2.18431  | 0.86098  |
| H | 3.02833  | 3.47343  | 1.06731  |
| H | 1.01701  | 2.92014  | -2.40334 |
| H | -0.89206 | 0.08051  | 2.9659   |
| C | 5.19258  | 1.608    | -1.58946 |
| H | 5.14379  | 1.97849  | -2.62153 |
| H | 6.12616  | 1.03434  | -1.53505 |
| C | 5.29173  | 2.81588  | -0.62638 |
| H | 6.34153  | 3.12186  | -0.54075 |
| H | 4.99694  | 2.51443  | 0.38302  |
| C | 4.54376  | 4.10681  | -1.03466 |
| H | 4.62185  | 4.84251  | -0.22364 |
| H | 5.04433  | 4.55087  | -1.89912 |
| H | 2.88167  | 4.37325  | -2.34367 |

**L<sup>3</sup>-2-TS2**

**E: -2552.53831922 a.u.**

|   |          |          |          |
|---|----------|----------|----------|
| O | -0.49613 | 0.44329  | 2.41828  |
| O | -5.76848 | -5.29007 | 0.0089   |
| N | -5.14033 | -4.6128  | -0.81374 |
| C | -4.43719 | -3.43363 | -0.33994 |
| O | -5.06894 | -4.88973 | -2.01938 |
| C | -4.46363 | -3.11126 | 1.02323  |
| C | -3.72759 | -2.64202 | -1.25486 |
| C | -3.75731 | -2.00839 | 1.47372  |
| H | -5.03019 | -3.73338 | 1.70599  |

|    |          |          |          |
|----|----------|----------|----------|
| C  | -3.03117 | -1.53683 | -0.80095 |
| H  | -3.73901 | -2.90996 | -2.3048  |
| C  | -3.01386 | -1.19356 | 0.57817  |
| H  | -3.76954 | -1.7393  | 2.52603  |
| H  | -2.46557 | -0.92212 | -1.49332 |
| O  | -2.34987 | -0.14764 | 1.02337  |
| P  | -0.11313 | 0.33254  | 0.86936  |
| O  | 1.44325  | 0.66445  | 0.87621  |
| O  | -0.07343 | -1.02569 | 0.12258  |
| O  | -0.61367 | 1.66683  | 0.02591  |
| C  | -1.86248 | 2.29628  | 0.01063  |
| C  | -2.57994 | 2.29631  | -1.18471 |
| C  | -2.28859 | 3.02217  | 1.12405  |
| C  | -3.76341 | 3.02418  | -1.26798 |
| H  | -2.21888 | 1.72046  | -2.0301  |
| C  | -3.47376 | 3.7463   | 1.04663  |
| H  | -1.70617 | 3.00493  | 2.0391   |
| C  | -4.19265 | 3.73863  | -0.14964 |
| H  | -4.35217 | 3.04235  | -2.17681 |
| H  | -3.84201 | 4.31628  | 1.89078  |
| N  | -5.43753 | 4.52075  | -0.23825 |
| O  | -5.79629 | 5.1384   | 0.76479  |
| O  | -6.04186 | 4.51267  | -1.31106 |
| Cu | 1.91912  | -1.13557 | 0.06232  |
| N  | 4.00706  | -0.89209 | -0.47754 |
| N  | 2.10359  | -2.93359 | -0.96843 |
| N  | 2.79419  | -2.3498  | 1.74425  |
| N  | 3.8962   | 3.80912  | -0.93322 |
| N  | 2.7946   | 2.99881  | 0.96984  |
| N  | 1.62795  | 3.30505  | -0.99278 |
| C  | 4.37562  | -2.01906 | -1.38134 |
| H  | 4.93389  | -2.76479 | -0.81188 |
| H  | 5.04867  | -1.67849 | -2.17717 |
| C  | 3.12776  | -2.66429 | -2.00915 |
| H  | 2.67417  | -1.98495 | -2.73874 |
| H  | 3.41655  | -3.57912 | -2.54491 |
| C  | 2.43183  | -4.05865 | -0.04056 |
| H  | 3.46553  | -4.36329 | -0.22803 |
| H  | 1.80708  | -4.92796 | -0.26988 |
| C  | 2.24423  | -3.68624 | 1.44154  |
| H  | 1.17662  | -3.64475 | 1.67826  |
| H  | 2.69186  | -4.4817  | 2.05587  |
| C  | 4.25964  | -2.18847 | 1.68115  |
| H  | 4.70589  | -3.09629 | 1.26417  |
| H  | 4.69304  | -2.07548 | 2.68225  |
| C  | 4.66613  | -0.95036 | 0.85353  |
| H  | 4.35071  | -0.05388 | 1.39583  |
| H  | 5.76236  | -0.92471 | 0.76496  |
| C  | 4.09111  | 0.43838  | -1.15358 |
| H  | 3.38391  | 1.07945  | -0.63216 |
| H  | 3.68752  | 0.28341  | -2.15934 |
| C  | 2.78125  | 3.37669  | -0.31155 |
| H  | 1.19719  | -3.09759 | -1.40462 |

|   |          |          |          |
|---|----------|----------|----------|
| H | 2.42816  | -2.02102 | 2.634    |
| H | 0.80768  | 2.87392  | -0.55514 |
| H | 2.17534  | 2.20514  | 1.23348  |
| H | 3.60586  | 3.18978  | 1.53946  |
| H | 1.63616  | 3.32084  | -2.00378 |
| H | -1.45841 | 0.16592  | 2.43566  |
| C | 5.47803  | 1.12974  | -1.24598 |
| H | 5.56998  | 1.59348  | -2.23623 |
| H | 6.27139  | 0.37359  | -1.20837 |
| C | 5.7537   | 2.19667  | -0.16004 |
| H | 6.83578  | 2.28455  | -0.0046  |
| H | 5.34977  | 1.86031  | 0.8008   |
| C | 5.28592  | 3.63987  | -0.46221 |
| H | 5.46441  | 4.27393  | 0.41577  |
| H | 5.90036  | 4.05282  | -1.26637 |
| H | 3.76603  | 4.32794  | -1.79246 |

### L<sup>3</sup>-2-PC

E : -2552.56328092 a.u.

|    |          |          |          |
|----|----------|----------|----------|
| O  | 0.82984  | -0.56055 | -1.45251 |
| O  | 8.23995  | -0.99306 | -2.50369 |
| N  | 7.98936  | -1.54766 | -1.43418 |
| C  | 6.57356  | -1.60825 | -1.01895 |
| O  | 8.81987  | -2.05665 | -0.68365 |
| C  | 5.59515  | -1.10093 | -1.89803 |
| C  | 6.26437  | -2.17324 | 0.23459  |
| C  | 4.27372  | -1.15671 | -1.52269 |
| H  | 5.90467  | -0.68025 | -2.84716 |
| C  | 4.94661  | -2.23672 | 0.62234  |
| H  | 7.06627  | -2.54277 | 0.8623   |
| C  | 3.89347  | -1.73023 | -0.24144 |
| H  | 3.48468  | -0.78051 | -2.16628 |
| H  | 4.6521   | -2.6601  | 1.57675  |
| O  | 2.68547  | -1.78851 | 0.12505  |
| P  | -0.38708 | 0.28112  | -0.8398  |
| O  | -1.40627 | 0.57721  | -1.90873 |
| O  | -0.83644 | -0.29192 | 0.50237  |
| O  | 0.29018  | 1.79196  | -0.51658 |
| C  | 1.44593  | 1.98611  | 0.21972  |
| C  | 1.68518  | 1.31129  | 1.42372  |
| C  | 2.35871  | 2.92388  | -0.27758 |
| C  | 2.86216  | 1.56657  | 2.12266  |
| H  | 0.95995  | 0.59518  | 1.79308  |
| C  | 3.5294   | 3.18744  | 0.4253   |
| H  | 2.14491  | 3.42736  | -1.21477 |
| C  | 3.76995  | 2.49634  | 1.61472  |
| H  | 3.08021  | 1.05712  | 3.05341  |
| H  | 4.2561   | 3.90385  | 0.06184  |
| N  | 5.02034  | 2.74617  | 2.3466   |
| O  | 5.78756  | 3.59829  | 1.89687  |
| O  | 5.23132  | 2.08224  | 3.36383  |
| Cu | -2.37629 | -1.52901 | 0.65179  |
| N  | -4.6036  | -0.75111 | 0.38124  |

|   |          |          |          |    |          |          |          |
|---|----------|----------|----------|----|----------|----------|----------|
| N | -3.38944 | -2.88436 | 1.99013  | C  | -0.04396 | 4.66683  | -0.87532 |
| N | -3.09507 | -2.97986 | -0.85351 | C  | 0.43199  | 2.482    | 0.8274   |
| N | -4.30063 | 3.90977  | -0.70922 | H  | -0.26454 | 3.77882  | 2.41261  |
| N | -2.97858 | 2.72076  | -2.23142 | C  | 0.45423  | 3.47761  | -1.39768 |
| N | -2.04291 | 3.56781  | -0.29723 | H  | -0.22733 | 5.52604  | -1.5093  |
| C | -5.4061  | -1.52662 | 1.34521  | C  | 0.67965  | 2.38582  | -0.55075 |
| H | -5.93404 | -2.32665 | 0.81929  | H  | 0.64796  | 1.63826  | 1.47258  |
| H | -6.1928  | -0.91095 | 1.80193  | H  | 0.67363  | 3.37638  | -2.45473 |
| C | -4.56176 | -2.12631 | 2.48616  | O  | 1.20815  | 1.25495  | -1.11521 |
| H | -4.17283 | -1.32244 | 3.12002  | P  | 0.68776  | -0.28672 | -0.8478  |
| H | -5.21995 | -2.75172 | 3.10985  | O  | -0.43228 | -0.52313 | 0.22192  |
| C | -3.71904 | -4.14377 | 1.27239  | O  | 1.09993  | -1.2728  | -1.9212  |
| H | -4.80487 | -4.20492 | 1.1494   | O  | 1.92765  | -0.60866 | 0.36023  |
| H | -3.43264 | -5.01633 | 1.87069  | C  | 3.28099  | -0.41632 | 0.20592  |
| C | -3.02801 | -4.24791 | -0.10229 | C  | 3.92336  | -0.31244 | -1.03768 |
| H | -1.96597 | -4.47454 | 0.0382   | C  | 4.02826  | -0.35901 | 1.39334  |
| H | -3.47674 | -5.09076 | -0.65162 | C  | 5.30534  | -0.15308 | -1.08388 |
| C | -4.43227 | -2.58903 | -1.34971 | H  | 3.35043  | -0.36533 | -1.95459 |
| H | -5.18057 | -3.26659 | -0.92613 | C  | 5.40824  | -0.20861 | 1.34875  |
| H | -4.49823 | -2.71516 | -2.43763 | H  | 3.51034  | -0.42578 | 2.34536  |
| C | -4.79112 | -1.12375 | -1.03211 | C  | 6.03403  | -0.10756 | 0.10492  |
| H | -4.12886 | -0.47596 | -1.61665 | H  | 5.82362  | -0.0707  | -2.03168 |
| H | -5.82571 | -0.95522 | -1.38017 | H  | 6.00019  | -0.16181 | 2.2546   |
| C | -4.62889 | 0.70416  | 0.63522  | N  | 7.49192  | 0.04837  | 0.04814  |
| H | -3.77612 | 1.13248  | 0.10062  | O  | 8.10852  | 0.07566  | 1.11567  |
| H | -4.41713 | 0.83129  | 1.70261  | O  | 8.01761  | 0.1408   | -1.06312 |
| C | -3.11665 | 3.39109  | -1.09022 | Cu | -2.16758 | -0.3462  | -0.64844 |
| H | -2.78314 | -3.09076 | 2.77965  | N  | -3.34018 | -1.37448 | 0.85666  |
| H | -2.42952 | -3.00421 | -1.62101 | N  | -3.98424 | -0.23364 | -1.6732  |
| H | -1.1568  | 3.11562  | -0.53653 | N  | -3.01819 | 1.49314  | 0.36258  |
| H | -2.27033 | 1.94985  | -2.27522 | N  | 0.23156  | -5.25841 | 0.48094  |
| H | -3.73851 | 2.70587  | -2.89609 | N  | 1.13743  | -3.20887 | 1.10038  |
| H | -2.18224 | 3.74951  | 0.68783  | N  | 1.23818  | -3.87884 | -1.11605 |
| H | 1.40318  | -1.04094 | -0.7969  | C  | -4.70932 | -1.57578 | 0.28673  |
| C | -5.93511 | 1.47405  | 0.28674  | H  | -5.38709 | -0.84281 | 0.72935  |
| H | -6.06444 | 2.28328  | 1.01828  | H  | -5.10546 | -2.55731 | 0.57064  |
| H | -6.7924  | 0.80828  | 0.44307  | C  | -4.73229 | -1.44248 | -1.24415 |
| C | -6.01849 | 2.06879  | -1.13943 | H  | -4.24284 | -2.30283 | -1.71022 |
| H | -7.0518  | 2.01967  | -1.50433 | H  | -5.77359 | -1.42108 | -1.59471 |
| H | -5.43234 | 1.46022  | -1.83491 | C  | -4.69289 | 1.06088  | -1.41672 |
| C | -5.61809 | 3.55251  | -1.26631 | H  | -5.57203 | 0.84867  | -0.80139 |
| H | -5.67935 | 3.87284  | -2.31469 | H  | -5.06848 | 1.47264  | -2.35904 |
| H | -6.33356 | 4.17034  | -0.71719 | C  | -3.79548 | 2.10194  | -0.72796 |
| H | -4.27649 | 4.61737  | 0.01313  | H  | -3.07042 | 2.49816  | -1.44498 |

### L<sup>3</sup>-3-TS1

E : -2552.54937029 a.u.

|   |          |         |          |   |          |          |         |
|---|----------|---------|----------|---|----------|----------|---------|
| O | -0.9401  | 0.28247 | -2.02392 | H | -3.58751 | 1.70681  | 2.4097  |
| O | -1.20459 | 5.98188 | 2.23612  | C | -3.34049 | -0.37691 | 1.9747  |
| N | -0.88909 | 5.97982 | 1.04332  | H | -2.31508 | -0.34467 | 2.35357 |
| C | -0.3195  | 4.74293 | 0.49204  | H | -3.99207 | -0.72404 | 2.79133 |
| O | -1.03468 | 6.93511 | 0.2802   | C | -2.74052 | -2.64755 | 1.36611 |
| C | -0.07547 | 3.6685  | 1.35125  | H | -3.37015 | -3.0187  | 2.19141 |

|   |          |          |          |
|---|----------|----------|----------|
| H | -1.76493 | -2.37978 | 1.7798   |
| C | 0.86547  | -4.10226 | 0.1489   |
| H | -3.76648 | -0.30366 | -2.66531 |
| H | -2.24004 | 2.09605  | 0.61951  |
| H | 1.46498  | -2.90486 | -1.41353 |
| H | 1.49213  | -2.26476 | 0.88012  |
| H | 1.11882  | -3.48681 | 2.07041  |
| H | 0.80756  | -4.43596 | -1.84321 |
| H | -0.82714 | -0.24514 | -2.83133 |
| C | -2.57533 | -3.75548 | 0.31639  |
| H | -1.81546 | -3.45623 | -0.41713 |
| H | -3.5103  | -3.88254 | -0.24058 |
| C | -2.24267 | -5.14133 | 0.91449  |
| H | -2.40077 | -5.89753 | 0.13424  |
| H | -2.96355 | -5.37994 | 1.70797  |
| C | -0.83173 | -5.35107 | 1.49631  |
| H | -0.62079 | -4.63541 | 2.2934   |
| H | -0.76925 | -6.34546 | 1.9476   |
| H | 0.18498  | -5.95489 | -0.25395 |

### L<sup>3</sup>-3-IM

E : -2629.03510705 a.u.

|   |          |          |          |
|---|----------|----------|----------|
| O | 0.85899  | 0.33378  | 1.84139  |
| O | 1.12165  | 6.0358   | -2.24887 |
| N | 0.7628   | 6.0271   | -1.06814 |
| C | 0.20645  | 4.77604  | -0.53577 |
| O | 0.85538  | 6.9867   | -0.30253 |
| C | 0.01618  | 3.69693  | -1.4029  |
| C | -0.11082 | 4.69172  | 0.82198  |
| C | -0.47763 | 2.49767  | -0.89558 |
| H | 0.23502  | 3.81375  | -2.45792 |
| C | -0.59528 | 3.48982  | 1.32792  |
| H | 0.03098  | 5.55458  | 1.46163  |
| C | -0.76503 | 2.39304  | 0.47436  |
| H | -0.65274 | 1.64879  | -1.54665 |
| H | -0.84512 | 3.38286  | 2.37771  |
| O | -1.28128 | 1.24632  | 1.01646  |
| P | -0.67694 | -0.27766 | 0.78708  |
| O | 0.3955   | -0.55349 | -0.33087 |
| O | -1.11596 | -1.28736 | 1.84948  |
| O | -1.9491  | -0.64753 | -0.40841 |
| C | -3.29926 | -0.46203 | -0.25728 |
| C | -3.94651 | -0.35417 | 0.98456  |
| C | -4.04911 | -0.41344 | -1.44498 |
| C | -5.32882 | -0.20128 | 1.02912  |
| H | -3.37428 | -0.39712 | 1.90205  |
| C | -5.42966 | -0.26985 | -1.40274 |
| H | -3.53079 | -0.47988 | -2.39698 |
| C | -6.05768 | -0.16514 | -0.16022 |
| H | -5.84842 | -0.11597 | 1.97593  |
| H | -6.02071 | -0.22979 | -2.30956 |
| N | -7.51514 | -0.01414 | -0.10521 |
| O | -8.13159 | 0.00607  | -1.17333 |

|    |          |          |          |
|----|----------|----------|----------|
| O  | -8.04259 | 0.08198  | 1.00521  |
| Cu | 2.13784  | -0.26687 | 0.49632  |
| N  | 3.3793   | -1.20884 | -0.99107 |
| N  | 3.91044  | -0.18253 | 1.60656  |
| N  | 2.99761  | 1.6286   | -0.39245 |
| N  | -0.10286 | -5.16025 | -0.81517 |
| N  | -1.13857 | -3.14523 | -1.34867 |
| N  | -1.1139  | -3.87514 | 0.85039  |
| C  | 4.72978  | -1.41783 | -0.37949 |
| H  | 5.40811  | -0.64874 | -0.7545  |
| H  | 5.15649  | -2.37413 | -0.70184 |
| C  | 4.68584  | -1.36469 | 1.1547   |
| H  | 4.18199  | -2.24827 | 1.55714  |
| H  | 5.7108   | -1.3541  | 1.55117  |
| C  | 4.61051  | 1.1279   | 1.4325   |
| H  | 5.5121   | 0.95265  | 0.83835  |
| H  | 4.94899  | 1.504    | 2.40345  |
| C  | 3.72498  | 2.18957  | 0.75792  |
| H  | 2.96641  | 2.5404   | 1.46381  |
| H  | 4.35856  | 3.04878  | 0.49036  |
| C  | 3.79074  | 1.24008  | -1.57253 |
| H  | 4.85611  | 1.29541  | -1.3287  |
| H  | 3.64023  | 1.93733  | -2.40578 |
| C  | 3.4095   | -0.16681 | -2.06759 |
| H  | 2.39971  | -0.13309 | -2.48719 |
| H  | 4.09736  | -0.47283 | -2.87076 |
| C  | 2.81599  | -2.46678 | -1.57581 |
| H  | 3.46257  | -2.77449 | -2.41401 |
| H  | 1.83768  | -2.20007 | -1.98428 |
| C  | -0.78044 | -4.04504 | -0.43587 |
| H  | 3.64662  | -0.30527 | 2.58286  |
| H  | 2.22763  | 2.24114  | -0.65154 |
| H  | -1.42087 | -2.94003 | 1.17785  |
| H  | -1.48824 | -2.20903 | -1.07859 |
| H  | -1.13553 | -3.39086 | -2.32765 |
| H  | -0.59417 | -4.39453 | 1.54698  |
| H  | 0.91392  | -0.17153 | 2.68258  |
| C  | 2.67137  | -3.63786 | -0.59406 |
| H  | 1.91123  | -3.3969  | 0.16009  |
| H  | 3.6099   | -3.78588 | -0.04896 |
| C  | 2.35671  | -4.98593 | -1.28088 |
| H  | 2.53961  | -5.79131 | -0.55729 |
| H  | 3.0694   | -5.15609 | -2.09891 |
| C  | 0.94044  | -5.17604 | -1.85458 |
| H  | 0.70736  | -4.40796 | -2.59481 |
| H  | 0.88161  | -6.13813 | -2.37179 |
| H  | -0.01164 | -5.8757  | -0.10275 |
| O  | 0.72143  | -1.66679 | 3.78604  |
| H  | -0.10545 | -1.65793 | 3.2389   |
| H  | 0.44758  | -1.5924  | 4.71305  |

### L<sup>3</sup>-3-TS2

E: -2552.55389301 a.u.



|    |          |          |          |
|----|----------|----------|----------|
| H  | 6.18044  | -1.36035 | 2.74556  |
| C  | 6.99822  | 0.22871  | -0.14314 |
| H  | 5.77092  | 0.45787  | -1.89998 |
| H  | 8.08791  | -0.09544 | 1.69206  |
| N  | 8.11912  | 0.9716   | -0.75192 |
| O  | 9.14502  | 1.09503  | -0.084   |
| O  | 7.95175  | 1.41829  | -1.88652 |
| Cu | -2.51501 | -0.2925  | -0.76963 |
| N  | -4.05016 | -1.07598 | 0.75596  |
| N  | -4.25725 | -0.50344 | -2.11765 |
| N  | -3.51357 | 1.60292  | -0.33158 |
| N  | -0.32022 | -4.47545 | 0.75289  |
| N  | 1.35657  | -2.97406 | 1.3542   |
| N  | 1.27142  | -3.79384 | -0.80877 |
| C  | -5.28564 | -1.38744 | -0.00487 |
| H  | -6.0078  | -0.57916 | 0.13905  |
| H  | -5.77446 | -2.28632 | 0.39435  |
| C  | -5.05055 | -1.59433 | -1.51348 |
| H  | -4.49312 | -2.52067 | -1.68071 |
| H  | -6.03386 | -1.70819 | -1.99776 |
| C  | -4.95512 | 0.80179  | -2.21753 |
| H  | -5.92112 | 0.7271   | -1.70758 |
| H  | -5.18484 | 1.04169  | -3.26222 |
| C  | -4.13267 | 1.96153  | -1.62435 |
| H  | -3.31249 | 2.21209  | -2.30483 |
| H  | -4.78243 | 2.84715  | -1.54645 |
| C  | -4.45273 | 1.42921  | 0.80018  |
| H  | -5.47766 | 1.44373  | 0.41777  |
| H  | -4.38558 | 2.27155  | 1.49981  |
| C  | -4.19055 | 0.13843  | 1.59581  |
| H  | -3.25182 | 0.25122  | 2.14836  |
| H  | -4.99553 | 0.01992  | 2.34257  |
| C  | -3.58908 | -2.20914 | 1.58789  |
| H  | -4.35186 | -2.46343 | 2.34665  |
| H  | -2.70302 | -1.85997 | 2.12978  |
| C  | 0.76313  | -3.74075 | 0.43752  |
| H  | -3.94107 | -0.7971  | -3.03766 |
| H  | -2.81437 | 2.30434  | -0.10178 |
| H  | 1.72773  | -2.92558 | -1.14692 |
| H  | 2.24201  | -2.49052 | 1.15937  |
| H  | 1.13499  | -3.08962 | 2.33183  |
| H  | 0.67984  | -4.2059  | -1.52035 |
| H  | 0.98295  | 0.40535  | -3.49181 |
| C  | -3.23693 | -3.47106 | 0.78898  |
| H  | -2.55603 | -3.19576 | -0.02699 |
| H  | -4.14177 | -3.88023 | 0.32545  |
| C  | -2.60801 | -4.57772 | 1.66057  |
| H  | -2.72854 | -5.55094 | 1.16513  |
| H  | -3.14657 | -4.66469 | 2.61227  |
| C  | -1.11906 | -4.37724 | 1.97999  |
| H  | -0.96251 | -3.38317 | 2.4109   |
| H  | -0.78548 | -5.12296 | 2.71176  |
| H  | -0.68605 | -5.07549 | 0.02484  |
